# Supplementary material for: Phylogenetic Signal Dissection Identifies the Root of Starfishes
Source: PLoS One. 2015 May 8;10(5):e0123331. doi: 10.1371/journal.pone.0123331 (PMC4425436; doi:10.1371/journal.pone.0123331)
Supplement: S1 Dataset — (PHY) [file pone.0123331.s001.phy]

31   3017
HEMISaccoglossus        GCCATGCATG TCTAAGTACG AGCCTCGGCA CGGTGAAACT GCGAATGGCT CATTAAATCA
HEMIHarrimania          GCCATGCATG TCTAAGTACG AGCCTCGGCA TAGCGAAACT GCGAATGGCT CATTAAATCA
HEMIPtychodera          GCCATGCATG TCTAAGTACG AGCCTCCGCA AAGCGAAACT GCGAATGGCT CATTAAATCA
HEMI_Cephalodiscus      ---------- ---------- --------cc cagcgaaact gcgaatggct cattaaatca
CRI_Florometra          gccatgcatg tctaagtaca agcttgtacc aagcgaaact gcggatggct cattaaatca
CRI_Tropiometra         ---ATGCATG TCTAAGTACA AGCTTGTACC AAGCGAAACT GCGGATGGCT CATTAAATCA
CRI_Endoxocrinus        ---ATGCATG TCTAAGTACA AGCTTGTACC AAGCGAAACT GCGGATGGCT CATTAAATCA
AST_FOR_Asterias        gccatgcatg tccaagtaca agctttca-a aagcgaaact gcggatggct cattaaatca
AST_FOR_Coscinasterias  -------atg tccaagtaca agcttttt-c aagcgaaact gcggatggct cattaaatca
AST_PAX_Astropecten     gccatgcatg tctaagtaMa agctttYa-S aagcgaaact gcagatggct cattaaatca
AST_VEL_Pteraster       gccatgcatg tctaagtacg agctttca-c aagcgaaact gcggatggct cattaaatca
AST_VEL_Hymenaster      ---------- ---------- ---------- ---------- ---------- ----------
AST_SPIN_Henricia       gccatgcatg tctaagtaca agctttca-K aagcgaaact gcggatggct cattaaatca
AST_SPIN_Echinaster     gccatgcatg tctaagtaca agctttca-g aagcgaaact gcggatggct cattaaatca
AST_VALV_Asterina       gccatgcatg tctaagtaaa agctttYR-c aagcgaaact gcggatggct cattaaatca
AST_VALV_Acodontaster   gccatgcatg tctaagtaaa agctttta-c aagcgaaact gcggatggct cattaaatca
OPH_Asteronyx           -ccatgcatg tctaagtaca agct-gtatg aggcgaaact gcggatggct cattaaatca
OPH_Ophiopsammus        gccatgcatg tgtaagtaca agcttgtatc aagcgaaact gcggatggct cattaaatca
OPH_Ophioderma          gccatgcatg tgtaagtaca agcttgtatc aagcgaaact gcggatggct cattaaatca
OPH_Ophiopholis         gccatgcatg tgttagtaca agcttgtatc aagcgaaact gcggatggct cattaaatca
OPH_Ophiocoma           ---------- --taagtaca agcttgtatc aagcgaaact gcggatggct cattaaatca
OPH_Ophiothrix          gccatgcatg tgttagtaca agcttgtatc aagcgaaact gcggatggct cattaaatga
OPH_Gorgonocephalus     gccatgcatg tctaagtaca agct-gtatg aggcgaaact gcggatggct cattaaatca
ECH_Calocidaris         GCCATGCATG TCTAAGTACA AGCTCGTCCC GAGCGAAACT GCGGATGGCT CATTAAATCA
ECH_Arbacia             gccatgcatg tctaagtaca agctc-tc-c gagcgaaact gcggatggct cattaaatca
ECH_Strongylocentrotus  gccatgcatg tctaagtaca agctcgtctc ga-cgaaact gcggatggct cattaaatca
ECH_Stereocidaris       GCCATGCATG TCTAAGTACA AGCTCGTCCC GAGCGAAACT GCGGATGGCT CATTAAATCA
ECH_Paracentrotus       gccatgcatg tcta-gtaca -gctcgtc-c ga-cagaact gcggatggct cattaa-tca
HOL_Cucumaria           gccatgcacg tctaagaaca atcgtgaaac aagagaatct gcagatggct cattagatca
HOL_Holothuria          gccatgcacg tctaagtaca atcgtgtaac c-gagaaact gcagatggct cattagatca
HOL_Psychropotes        gccatgcacg tctaagtaca atcctgatat aagagaaact gcagatggct cattagatca

                        GTTATGGTTC CTTTGATCGT TACCCCTTAC TTGGATAACT GTGGCAATTC TAGAGCTAAT
                        GTTATGGTTC CTTTGATCGT TACCCCTTAC TTGGATAACT GTGGCAATTC TAGAGCTAAT
                        GTTATGGTTC CTTTGATCGT TACCCATTAC TTGGATAACT GTGGTAATTC TAGAGCTAAT
                        gtcgtggtcc acgggatcgt gcacggttac ttggataact gtggtaattc tagagctaat
                        gttatggttc cttggaactg agttacctac atggataact gtggtaattc tagagctaat
                        GTTATGGTTC CTTGGAACTG AGTTACCTAC ATGGATAACT GTGGTAATTC ?AGAGCTAA?
                        GTTATGGTTC CTTGGAACTG AGTTACCTAC ATGGATAACT GTGGTAATTC TAGAGCTAAT
                        gttatggttc cttggagcgc atccccttac atggataact gtggtaattc tagagctaat
                        gttatggttc cttggagcgc atccccttac atggataact gtggtaattc tagagctaat
                        gttatggttc cttggWgcgM MtYcccctac atggataact gtggtaattc tagagctaat
                        gttatggttc cttggtgcga aacagcctac atggataact gtggtaattc tagagctaat
                        ---------- ---------- ---------- ---------- ---------- ----------
                        gttatggttc cttggagtgc acagccctac atggataact gtggtaattc tagagctaat
                        gttatggttc cttggagtgc acagccctac atggataact gtggtaattc tagagctaat
                        gttatggttc cttggagcgc atccYcctac atggataact gtggtaattc tagagctaat
                        gttatggttc cttggagcgc acccccctac atggataact gtggtaattc tagagctaat
                        gtcatagttc cttggatcga gtttccttac atggataact gtggtaattc tagagctaat
                        gtcatggttc cttggaacga gttgccctac atggataact gtggtaattc tagagctaat
                        gtcatggttc cttggaacga gttgccctac atggataact gtggtaattc tagagctaat
                        gtcatggttc cttggaacga gttgccctac atggataact gtggtaattc tagagctaat
                        gtcatggttc cttggaatga gttgccctac atggataact gtggtaattc tagagctaat
                        gtcatggttc cttggaacga gttgccctac atggataact gtggtaattc tagagctaat
                        gtcatagttc cttggatcga gtttccttac atggataact gtggtaattc tagagctaat
                        GTTATGGTTC ATTGGATCGA GTCCCCCGAC ATGGATAACT GTGGTAATTC TAGAGCTAAT
                        gttatggttc attggatcga gtcccccgac atggataact gtggtaattc tagagctaat
                        gttatggttc attggatcga gtcccccgac atggataact gtggtaattc tagagctaat
                        GTTATGGTTC ATTGGATCGA GTCCCCCGAC ATGGATAACT GTGGTAATTC TAGAGCTAAT
                        gtt-tggttc attggatcga gtcccccgac atggataact gtggtaattc tagagctaat
                        gttatggttt attggagaca gtcagttgcc atggataact gtggtaattc tagagctaat
                        gttatggttc attggagcca gttcacgacc atggataact gtggtaattc tagagctaat
                        gtcatggttc cttggagttc gtaaaatgcc atggataact gtggtaattc tagagctaat

                        ACATGCACCT CGGCGCTGAC CTCRCGGGAT GCGTGCTTTT ATTAGGACCA AGACCGACCC
                        ACATGCACCT CGGCGCTGAC CTCGCGGGAT GCGTGCTTTT ATTAGGACCA AGACCGACCC
                        ACATGCGAAT GAGCGCCGAC CTCGCGGGAG GCGTGCTTTT ATTAGGACCA AGACCAATCC
                        acatgcgaac -agcgcggac cccgccgaac gcgtgctttt attaggaaca aggccagccc
                        acatgcgaac aagcgccgac ctcacggaag gcgtgctttt attaggaaca aggccaatgc
                        ?CATGCGAAC AAGCGCCGAC CTCGCGGAAG GCGTGCTTTT ATTAGGAACA AGGCCAATGC
                        ACATGCGAAC AAGCGCCGAC CTCGCGGAAG GCGTGCTTTT ATTAGGAACA AGGCCAATCC
                        acatgcaatc aagcgccgac cttacgggag gcgtgctctt attaggaaca agaccaaccc
                        acatgcaatc aagcgccgac cttacgggag gcgtgctctt attaggaaca agaccaaccc
                        acatgccaRc aagcgccgac cttgcgggag gcgtgctttt attaggaaca agaccaaccc
                        acatgccgag aagcgccgac cttgcgggag gcgtgctctt attaggaaca agaccgaccc
                        ---------- ---------- ---GCGGGAG GCGTGCTCTT ATTAGGAACA AGACCGACCC
                        acatgccaac aagcgccgac cttgcgggag gcgtgctttt attaggaaca agaccaaccc
                        acatgccaac aagcgccgac cttgcgggag gcgtgctttt attaggaaca agaccaaccc
                        acatgccagc aagcgccgac ctYRcgggag gcgtgctYtt attaggaaca agaccaaccc
                        acatgccagc aagcgccgac cttgcgggag gcgtgctttt attaggaaca agaccaaccc
                        acatgccacg aagcgccgac cttacggaag gcgtgctttt attaggatca agaccaacac
                        acatgccacc aagcgccgac cttacggaag gcgtgctttt attaggaaca agaccaactc
                        acatgccacc aagcgccgac cttacggaag gcgtgctttt attaggaaca agaccaactc
                        acatgctacc aagcgccgac ctcttggaag gcgtgctttt attaggaaca agaccaag-c
                        acatgccacc aagcgccgac cttacggaag gcgtgctttt attaggaaca agaccaacYc
                        acatgctaac aagcgccgac cacccggaag gcgtgctttt attaggaaca agaccaaccg
                        acatgccacg aagcgccgac cttacggaag gcgtgctttt attaggatca agaccaacac
                        ACATGCGTCC AAGCGCCGAC TCCAC-GAAG GCGTGCTTTT ATTAGGAACA AGACCAGCCC
                        acatgcgtcc aagcgccgac tccccagaag gcgtgctttt attaggaaca agaccagccc
                        acatgcgtcc aagcgccgac tttccagaag gcgtgctttt attaggaaca agaccagccc
                        ACATGCGTCC AAGCGCCGAC TCCAC-GAAG GCGTGCTTTT ATTAGGAACA AGACCAGCCC
                        acatgcgtcc aagcgccgac tttccagaag gcgtgctttt attaggaaca agaccagccc
                        acatgcgatt aagcgccgac ttcgggggaa gcgtgctttt attaggaaca aggccagccc
                        acatgcatct aagcgccgac ttcgggggaa gcgtgctttt attaggaaca aggccagccc
                        acatgcactt aagcgctgac ttcggggaaa gcgtgctttt attaggaaca aggccagccc

                        GGTGTCCCCC GGTCCTTCTG GCGAACTCTG GATAACTTGG CGGATCGCAC GGCCTCCGCG
                        GGTGTCCCCC GGTCCCATTG GCGAACTCTG GATAACTTGG CGGATCGCAC GGCCTCCGCG
                        GG-GTCTCCC GGTCCACTTG GCGAACTCTG GATAACTTGG CGGATCGCAC GGCCTCGGCG
                        ga--ctgcgc ggacctgttg gcgaactctg gataacgtgg cggatcgcac ggccccggtg
                        gggcttgccc gctccccttg gtgaactctg gataactttg ctgatcgcac ggtct-agca
                        GGGCTTGCCC GCTCCCCTTG GTGAACTCTG GATAACTTTG CTGATCGCAC GGTCT-AGCA
                        GGGCTTGCCC GGTCCCCTTG GTGAACTCTG GATAACTTTG CTGATCGCAC GGTCT-AGCA
                        gggtccgccc ggctccgttg gtgaactctg gataacctgg ccgatcgcac ggtctctgca
                        gggtccgccc ggctccgttg gtgaactctg gataacctgg ccgatcgcac ggtctctgca
                        gggctcgccc ggctccgttg gtgaactctg gataacctRg ccgatcgcac ggtctccgca
                        gggctcgccc ggccccgttg gtgaactctg gataacctgg ccgatcgcac ggtctcYgca
                        GGGCTCGCCC GGCCCCGTTG GTGAACTCTG GATAACCTGG CCGATCGCAC GGTCTCTGCA
                        gggcccgccc ggcggcgttg gtgaactctg gataacctgg ccgatcgcac ggtcctggca
                        gggctcgccc ggcggcgttg gtgaactctg gataacctgg ccgatcgcac ggtcctggca
                        gggctcgccc ggcKccgttg gYgaactctg gataacctgg ccgatcgcac ggtccYcgca
                        gggctcgccc ggctccgttg gtgaactctg gataacctgg ccgatcgcac ggtcttcgca
                        gggcttgccc ggcttcgttg gtgaactctg gataacttcg cagatcgcat tgtcatcgaa
                        gg-cttgtcc ggcttcgttg gtgaactctg gataacttag cagatcgcac ggtcatcgta
                        gg-cttgtcc ggcttcgttg gtgaactctg gataacttag cagatcgcac ggtcatcgta
                        ---ctagccc gctttcgttg gtgaactctg gataacttag cagatcgcac ggtcatcgca
                        gg-cttgtcc ggcttcgttg gtgaactctg gataacttag ctgatcgcac ggtcatcgta
                        ggcctag-cc cgcttcgttg gtgaactctg gataacttag cagatcgcac ggtcatcgca
                        gggcttgccc ggattcgttg gtgaactctg gataacttcg cagatcgcat tgtcatcgaa
                        GG-TTCGGCC GGCAAGACTG GTGAACTCTG GATAACACAG CCGATCGCAC GGTCCTGGCA
                        ggtttcggcc ggcaccactg gtgaactctg gataacacag ccgatcgcac ggtcYtcgca
                        ggtctcggcc ggccacactg gtgaactctg gataacacag ccgatcgcac ggtctttgca
                        GG-TTCGGCC GGCAAGACTG GTGAACTCTG GATAACACAG CCGATCGCAC GGTCCTGGCA
                        ggtctcggcc ggccacactg gtgaactctg gataacacag ccgatcgcac ggtcttcgca
                        ggtctctgcc ggtctcgctg gKgaactcta gataaccacg ccgatcgcac ggtc-tcgca
                        ggtgtctccc ggtctcgctg gtgaactcta gataacccag ccgatcgcac ggtc-tcgca
                        ggaaggaccc ggtctcgctg gtgaactcta gataacaatg tcgatcgtac ggtc-tcgca

                        CCGGCGACGA ATCTTTCGAG TGTCTGCCCT ATCAACTTTC GACGGTACGT CATGCGCCTA
                        CCGGCGACGA ATCTTTCAAG TGTCTGCCCT ATCAACTTTC GACGGTACGC TACGCGCATA
                        CCGGCGACGA ATCTTTCAAG TGTCTGCCCT ATCAACTTTC GATGGTACGT TATGCGCCTA
                        ccggcgacgg atcctccgag cgtctgccct atcaactttc gacggtaggc caccggccta
                        ccggcgacgg atccttcaaa tgtctgccct atcaactttc gatggtacgt tatgcgccta
                        CCGGCGACGG ATCCTTCAAA TGTCTGCCCT ATCAACTTTC GATGGTACGT TATGCGCCTA
                        CCGGCGACGG ATCTTTCAAA TGTCTGCCCT ATCAACTTTC GATGGTACGT TATGCGCCTA
                        ccggcgacgg atccttcgaa tgtctgccct atcaactttc gatggtacgt tatgcgccta
                        ccggcgacgg atccttcgaa tgtctgccct atcaactttc gatggtacgt tatgcgccta
                        ccggcgacgg atccttcgaa tgtctgcccY atcaactttc gatggtacgt tatgcgccta
                        ccggcgacgg atccttcgaa tgtctgccct atcaactttc gatggtacgt tatgcgccta
                        CCGGCGACGG ATCCTTCGAA TGTCTGCCCT ATCAACTTTC GATGGTACGT TATGCGCCTA
                        ccggcgacgg atccttcgaa tgtctgccct atcaactttc gatggtacgt tatgcgccta
                        ccggcgacgg atccttcgaa tgtctgccct atcaactttc gatggtacgt tatgcgccta
                        ccggcgacgg atccttcgaa tgtctgccct atcaactttc gatggtacgt tatgcgccta
                        ccggcgacgg atccttcgaa tgtctgccct atcaactttc gatggtacgt tatgcgccta
                        caggcgacat ttctttcaaa cgtctgacct atcaattttc gatggtacga tatgcgccta
                        ccggcgacag atccttcaaa cgtctgccct atcaactttc gatggtacgt tatgcgccta
                        ccggcgacag atccttcaaa cgtctgccct atcaactttc gatggtacgt tatgcgccta
                        ccggcgacag aaccatcaaa cgtctgccct atcaactttc gatggtacgt tatgcgccta
                        ccggcgacag atccttcaaa cgtctgccct atcaactttc gatggtacgt tatgcgccta
                        ccggcgacag aaccatcaaa cgtctgccct atcaactttc gatggtacgt tatgcgccta
                        caggcgacat ttctttcaaa cgtctgacct atcaattttc gatggtacga tatgcgccta
                        CCGGCGACGG ATCCTTCGAA TGTCTGCCCT ATCAACTTTC GATGGTACGT TATGCGCCTA
                        ccggcgacgg atccttcgaa tgtctgcccT atcaactttc gatggtacgt tatgcgccta
                        ccggcgacgg atccttcgaa tgtctgccct atcaactttc gatggtacgt tatgcgccta
                        CCGGCGACGG ATCCTTCGAA TGTCTGCCCT ATCAACTTTC GATGGTACGT TATGCGCCTA
                        ccggcgacgg atccttcgaa tgtctgccct atcaactttc gatggtacgt tatgcgccta
                        ccggcgacgc tcccttcaaa agtctgctct atcaactttc gatggtaagt tatctgctta
                        ccggcgacgc tcccttcaaa tgtctgctct atcaactgtc gatggtacgt tatgcgctta
                        ccggcgacgc ttccttcaaa agtctgctct atcaactgtc gatggtacgt tatgcgctta

                        CCGTGGTGGC AACGGGTAAC GGGGAATCAG GGTTCGATTC CGGAGAGGGA GCTTGAGAAA
                        CCGTGGTGGC AACGGGTAAC GGGGAATCAG GGTTCGATTC CGGAGAGGGA GCCTGAGAAA
                        CCATGGTTGT AACGGGTAAC GGGGAATCAG GGTTCGATTC CGGAGAGGGA GCCTGAGAAA
                        ccgtggtggc aacgggtgac ggggaatcgg ggttcgattc cggagaggga gcctgagaga
                        ccatggtcgt cacgggtaac ggagaatcag ggttcgattc cggagaggga gcttgagaaa
                        CCATGGTCGT CACGGGTAAC GGAGAATCAG GGTTCGATTC CGGAGAGGGA GCTTGAGAAA
                        CCATGGTCGT CACGGGTAAC GGAGAATCAG GGTTCGATTC CGGAGAGGGA GCTTGAGAAA
                        ccatggtcgt aacgggtaac ggagaatcag ggttcgattc cggagaggga gcttgagaaa
                        ccatggtcgt aacgggtaac ggagaatcag ggttcgattc cggagaggga gcttgagaaa
                        ccatggtcgt aacgggtaac ggagaatcag ggttcgattc cggagaggga gcttgagaaa
                        ccatggtcgt aacgggtaac ggagaatcag ggttcgattc cggagaggga gcttgagaaa
                        CCATGGTCGT AACGGGTAAC GGAGAATCAG GGTTCGATTC CGGAGAGGGA GCTTGAGAAA
                        ccatggtcgt aacgggtaac ggagaatcag ggttcgattc cggagaggga gcttgagaaa
                        ccatggtcgt aacgggtaac ggagaatcag ggttcgattc cggagaggga gcttgagaaa
                        ccatggtcgt aacgggtaac ggagaatcag ggttcgattc cggagaggga gcttgagaaa
                        ccatggtcgt aacgggtaac ggagaatcag ggttcgattc cggagaggga gcttgagaaa
                        ccatggtgct aacgggtgac ggggaatcag ggttcgattc cggagaggga gcctgagaaa
                        ccatggtcgt aacgggtaac ggagaatcag ggttcgattc cggagaggga gcctgagaaa
                        ccatggtcgt aacgggtaac ggagaatcag ggttcgattc cggagaggga gcctgagaaa
                        ccatggtcgt aacgggtaac ggagaatcag ggttcgattc cggagaggga gcctgagaaa
                        ccatggtcgt aacgggtaac ggagaatcag ggttcgattc cggagaggga gcctgagaaa
                        ccatggtcgt aacgggtaac ggagaatcag ggttcgattc cggagaggga gcctgagaaa
                        ccatggtgct aacgggtgac ggggaatcag ggttcgattc cggagaggga gcctgagaaa
                        CCATGGTGGT CACGGGTAAC GGAGAATCAG GGTTCGATTC CGGAGAGGGA GCCTGAGAAA
                        ccatggtcgt cacgggtaac ggagAatcag ggttcgattc cggagaggga gcctgagaaA
                        ccatggtcgt cacgggtaac ggagaatcag ggttcgattc cgGagaggga gcCtgagaaa
                        CCATGGTGGT CACGGGTAAC GGAGAATCAG GGTTCGATTC CGGAGAGGGA GCCTGAGAAA
                        ccatggtcgt cacgggtaac ggagaatcag ggttcgattc cggagaggga gcctgagaaa
                        tcatggttgt gatgggtaac ggagaatcag ggttcgattc cggagaggga gcctgagaaa
                        tcatggtagt gacgggtaac ggagaatcag ggttcgattc cggagaggga gcctgagaaa
                        tcatggtaat gacgggtaac ggagaatcag ggttcgattc cggagaggga gcctgagaaa

                        CGGCTACCAC ATCCAAGGAA GGCAGCAGGC GCGCAAATTA CCCATTCCCG ACACGGGGAG
                        CGGCTACCAC ATCCAAGGAA GGCAGCAGGC GCGCAAATTA CCCATTCCCG ACACGGGGAG
                        CGGCTACCAC ATCCAAGGAA GGCAGCAGGC GCGCAAATTA CCCATTCCCG ACACGGGGAG
                        cggctaccac atccaaggaa ggcagcaggc gcgcaaatta cccattcccg acacggggag
                        cggctaccac atccaaggaa ggcagcaggc gcgcaaatta cccactcctg acacagggag
                        CGGCTACCAC ATCCAAGGAA GGCAGCAGGC GCGCAAATTA CCCACTCCTG ACACAGGGAG
                        CGGCTACCAC ATCCAAGGAA GGCAGCAGGC GCGCAAATTA CCCACTCCTG ACACAGGGAG
                        cggctaccac atccaaggaa ggcagcaggc gcgcaaatta cccactcccg acacggggag
                        cggctaccac atccaaggaa ggcagcaggc gcgcaaatta cccactcccg acacggggag
                        cggctaccac atccaaggaa ggcagcaggc gcgcaaatta cccactcYcg acacgRggag
                        cggctaccac atccaaggaa ggcagcaggc acgcaaatta cccactcccg acacggtgag
                        CGGCTACCAC ATCCAAGGAA GGCAGCAGGC ACGCAAATTA CCCACTCCCG ACACGGTGAG
                        cggctaccac atccaaggaa ggcagcaggc gcgcaaatta cccactcccg acacggggag
                        cggctaccac atccaaggaa ggcagcaggc gcgcaaatta cccactcccg acacggggag
                        cggctaccac atccaaggaa ggcagcaggc gcgcaaatta cccactcccg acacggggag
                        cggctaccac atccaaggaa ggcagcaggc gcgcaaatta cccactcccg acacggggag
                        tggctaccac atccaaggaa ggcagcaggc gcgcaaatta cccactctcg acacgaggag
                        tggctaccac atccaaggaa ggcagcaggc gcgcaaatta cccactctcg acacggggag
                        tggctaccac atccaaggaa ggcagcaggc gcgcaaatta cccactctcg acacggggag
                        tggctaccac atccaaggaa ggcagcaggc gcgcaaatta cccactctcg acacggggag
                        tggctaccac atccaaggaa ggcagcaggc gcgcaaatta cccactctcg acacgaggag
                        tggctaccac atccaaggaa ggcagcaggc gcgcaaatta cccactctcg acacggggag
                        tggctaccac atccaaggaa ggcagcaggc gcgcaaatta cccactctcg acacgaggag
                        CGGCTACCAC ATCCAAGGAA GGCAGCAGGC GCGCAAATTA CCCACTCCCG ACACGGGGAG
                        cggctaccac atccaaggaa ggcagcaggc gcgcaaatta cccactcccg acacggggag
                        cggctaccac atccaaggaa ggcagcaggc gcgcaaatta cccactcccg acacggggag
                        CGGCTACCAC ATCCAAGGAA GGCAGCAGGC GCGCAAATTA CCCACTCCCG ACACGGGGAG
                        cggctaccac atccaaggaa ggcagcaggc gcgcaaatta cccactcccg acacggggag
                        cggctaccac atccaaggaa ggcagcaggc acgcaaatta cccactcccg acacggggag
                        cggctaccac atccaaggaa ggcagcaggc acgcaaatta cccactcctg acacggggag
                        cggctaccac atccaaggaa ggcagcaggc acgcaaatta cccactcctg acacggggag

                        GTAGTGACGA AAAATAACGA TACGGGACTC TTTGGAGGCC CCGTAATCGG AATGAGCACA
                        GTAGTGACGA AAAATAACGA TACGGGACTC TTTGGAGGCC CCGTAATCGG AATGAGCACA
                        GTAGTGACGA AAAATAACAA TACAGGACTC TTTCGAGGCC CTGTAATTGG AATGAGTACA
                        gtagtgacga aaaataacga tgcgagactc tctcgagRcc tcgcaatcgg aatgRKcMca
                        gtagtgacga aaaataacaa tacaggtctc tctcgaggcc ctgtaattgg aatgagtaca
                        GTAGTGAC?A AAAATAACAA TACAGGTCTC TCTCGAGGCC CTGTAATTGG AATGAGTACA
                        -TAGTGACGA AAAATAACAA TACAGGTCTC TCTCGAGGCC CTGTAATTGG AATGAGTACA
                        gtagtgacga aaaatagcaa tacaggactc tttcgaggcc ctgtaattgg aatgagtaca
                        gtagtgacga aaaatagcaa tacaggactc tttcgaggcc ctgtaattgg aatgagtaca
                        gtagtgacga aaaatagcaa tacaggactc tttcgaggcc ctgtaattgg aatgagtaca
                        gtagtgacga aaaatagcaa tacRggactc tttcgaggcc cYgtaattgg aatgagtaca
                        GTAGTGACGA AAAATAGCAA TACAGGACTC TTTCGAGGCC CTGTAATTGG AATGAGTACA
                        gtagtgacga aaaatagcaa tacaggactc tttcgaggcc ctgtaattgg aatgagtaca
                        gtagtgacga aaaatagcaa tacaggactc tttcgaggcc ctgtaattgg aatgagtaca
                        gtagtgacga aaaatagcaa tacRggactc tttcgaggcc cYgtaattgg aatgagtaca
                        gtagtgacga aaaatagcaa tacaggactc tttcgaggcc ctgtaattgg aatgagtaca
                        gtagtgacga aaaataacaa tacaggactc tttcgaggcc ctgtaattgg aatgagtaca
                        gtagtgacga aaaataacaa tacaggactc tttcgaggcc ctgtaattgg aatgagtaca
                        gtagtgacga aaaataacaa tacaggactc tttcgaggcc ctgtaattgg aatgagtaca
                        gtagtgacga aaaataacaa tacaggactc tttcgaggcc ctgtaattgg aatgagtaca
                        gtagtgacga aaaataacaa tacaggactc tttcgaggcc ctgtaattgg aatgagtaca
                        gtagtgacga aaaataacaa tacaggactc tttcgaggcc ctgtaattgg aatgagtaca
                        gtagtgacga aaaataacaa tacaggactc tttcgaggcc ctgtaattgg aatgagtaca
                        GTAGTGACGA AAAATAACAA TACAGGACTC TTTCGAGGCC CTGTAATTGG AATGAGTACA
                        gtagtgacga aaaataacaa tacaggactc tttcgaggcc ctgtaattgg aatgagtaca
                        gtagtgacga aaaataacaa tacaggactc tttcgaggcc ctgtaattgg aatgagtaca
                        GTAGTGACGA AAAATAACAA TACAGGACTC TTTCGAGGCC CTGTAATTGG AATGAGTACA
                        gtagtgacga aaaataacaa tacaggactc tttcgaggcc ctgtaattgg aatgagtaca
                        gtagtgacaa aaaataacga tacaggcctc ttcggaggct ctgtgatcgg aatgagtaca
                        gtagtgacaa aaaataacga tacaggcctc ttcggaggcc ctgtgatcgg aatgagtaca
                        -tagtgacaa aaaataacga tacaggcctc ttcggaggcc ctgtgatcgg aatgagtaca

                        GTCCAAATCC TTTAGCGAGG ATCCATTGGA GGGCAAGTCT GGTGCCAGCA GCCGCGGTAA
                        GACCAAATCC TTTAGCGAGG ATCCATTGGA GGGCAAGTCT GGTGCCAGCA GCCGCGGTAA
                        CTTTAAAACC TTTAACGAGG ATCTATTGGA GGGCAAGTCT GGTGCCAGCA GCCGCGGTAA
                        gtgcaaagRa ctgggcgagg atcgattgga gggcaagtct ggtgccagca gccgcggtaa
                        ctttaaatcc tttaacgagg atctattgga gggcaagtct ggtgccagca gccgcggtaa
                        CTTTAAATTC TTTAACGAGG ATCTATTGGA GGGCAAGTCT GGTGCCAGCA GCCGCGGTAA
                        CTTTAAATCC TTTAACGAGG ATCTATTGGA GGGCAAGTCT GGTGCCAGCA GCCGCGGTAA
                        ctttaaatcc tttaacgagg atctattgga gggcaagtct ggtgccagca gccgcggtaa
                        ctttaaatcc tttaacgagg atctattgga gggcaagtct ggtgccagca gccgcggtaa
                        ctttaaatcc tttaacgagg atctattgga gggcaagtct ggtgccagca gccgcggtaa
                        Stctaaatcc tttaacgagg atctattgga gggcaagtct ggtgccagca gccgcggtaa
                        GTCTAAATCC TTTAACGAGG ATCTATTGGA GGGCAAGTCT GGTGCCAGCA GCCGCGGTAA
                        ctttaaatcc tttaacgagg atctattgga gggcaagtct ggtgccagca gccgcggtaa
                        ctttaaatcc tttaacgagg atctattgga gggcaagtct ggtgccagca gccgcggtaa
                        ctttaaatcc tttaacgagg atctattgga gggcaagtct ggtgccagca gccgcggtaa
                        ctttaaatcc tttaacgagg atctattgga gggcaagtct ggtgccagca gccgcggtaa
                        ctttaaatcc tttaacgagg atctactgga gggcaagtct ggtgccagca gccgcggtaa
                        ctttaaatcc tttaacgagg atctactgga gggcaagtct ggtgccagca gccgcggtaa
                        ctttaaatcc tttaacgagg atctactgga gggcaagtct ggtgccagca gccgcggtaa
                        ctttaaatcc tttaacgagg atctactgga gggcaagtct ggtgccagca gccgcg-taa
                        ctttaaatcc tttaacgagg atctactgga gggcaagtct ggtgccagca gccgcggtaa
                        ctttaaatcc tttaacgagg atctactgga gggcaagtct ggtgccagca gccgcggtaa
                        ctttaaatcc tttaacgagg atctactgga gggcaagtct ggtgccagca gccgcggtaa
                        CTTTAAATCC TTTAACGAGG ATCCACTGGA GGGCAAGTCT GGTGCCAGCA GCCGCGGTAA
                        ctttaaatcc tttaacgagg atccactgga gggcaagtct ggtgccagca gccgcgGtaa
                        ctttaaatcc tttaacgagg atccactgga gggcaagtct ggtgccagca gccgcgGtaa
                        CTTTAAATCC TTTAACGAGG ATCCACTGGA GGGCAAGTCT GGTGCCAGCA GCCGCGGTAA
                        ctttaaatcc tttaacgagg atccactgga gggcaagtct ggtgccagca gccgcggtaa
                        ctttaaatcc tttaacgagg atctactgga gggcaagtct ggtgccagca gccgcggtaa
                        ctttaaatcc tttaacgagg atctactgga gggcaagtct ggtgccagca gccgcggtaa
                        ctttaaatcc tttaacgagg atctactgga gggcaagtct ggtgccagca gccgcggtaa

                        TTCCAGCTCC AATAGCGTAT ATTAAAGCTG CTGCAGTTAA AAAGCTCGTA GTTGGATCTT
                        TTCCAGCTCC AATAGCGTAT ATTAAAGCTG CTGCAGTTAA AAAGCTCGTA GTTGGATCTT
                        TTCCAGCTCC AATAGCGTAT ATTAAAGCTG CTGCAGTTAA AAAGCTCGTA GTTGGATCTT
                        ttccagctcc aatagcgtat attaaagctg ttgcagttaa aaagctcgta gtcggatgtc
                        ttccagctcc aatagcgtat attaaagctg ttgcagttaa aaagctcgta gttggatctt
                        TTCCA-CTCC AATAGCGTAT ATTAAAGCTG TTGCAGTTAA AAAGCTCGTA GTTGGATCTT
                        TTCCAGCTCC AATAGCGTAT ATTAAAGCTG TTGCAGTTAA AAAGCTCGTA GTTGGATCTT
                        ttccagctcc aatagcgtat attaaaattg ctgcagttaa aaagctcgta gttggatctt
                        ttccagctcc aatagcgtat attaaaattg ctgcagttaa aaagctcgta gttggatctt
                        ttccagctcc aatagcgtat attaaaattg ctgcagttaa aaagctcgta gttggatctt
                        ttccagctcc aagagcgtat attaaaattg ctgcagttaa aaagctcgta gttggatctt
                        TTCCAGCTCC AAGAGCGTAT ATTAAAATTG CTGCAGTTAA AAAGCTCGTA GTTGGATCTT
                        ttccagctcc aatagcgtat attaaaattg ctgcagttaa aaagctcgta gttggatctt
                        ttccagctcc aatagcgtat attaaaattg ctgcagttaa aaagctcgta gttggatctt
                        ttccagctcc aatagcgtat attaaaattg ctgcagttaa aaagctcgta gttggatctt
                        ttccagctcc aatagcgtat attaaaattg ctgcagttaa aaagctcgta gttggatctt
                        ttccagctcc agtggcgtat attaatactg ctgcagttaa aaagctcgta gttggatcta
                        ttccagctcc agtagcgtat attaatgctg ctgcagttaa aaagctcgta gttggatcta
                        ttccagctcc agtagcgtat attaatgctg ctgcagttaa aaagctcgta gttggatcta
                        ttccagctcc agtagcgtat attaatgctg ctgcagttaa aaagctcgta gtcgtatcta
                        ttccagctcc agtagcgtat attaatgctg ctgcagttaa aaagctcgta gttggatcta
                        ttccagctcc agtagcgtat attaatgctg ctgcagttaa aaagctcgta gtcgtatcta
                        ttccagctcc agtggcgtat attaatactg ctgcagttaa aaagctcgta gttggatcta
                        TTCCAGCTCC AGTAGCGTAT ATTAAAGCTG TTGCAGTTAA AAAGCTCGTA GTTGGATCTT
                        ttccagctcc agtagcgtat attaaagctg ttgcagttaa aaagctcgta gttggatctt
                        ttccagctcc agtagcgtat attaaagctg ttgcagttaa aaagctcgta gttggatctt
                        TTCCAGCTCC AGTAGCGTAT ATTAAAGCTG TTGCAGTTAA AAAGCTCGTA GTTGGATCTT
                        ttccagctcc agtagcgtat attaaagctg ttgcagttaa aaagctcgta gttggatctt
                        ttccagctcc agcagcgtat attaaatttg ctgcagttaa aaagctcgta gtcggatttc
                        ttccagctcc agcagcgtat attaaatttg ctgcagttaa aaagctcgta gtcggatgtc
                        ttccagctcc agcagcgtat attaaatctg ctgcagttaa aaagctcgta gtcggatctc

                        GGTCCGCGGG CGGGCGGAAG TTCTCCCTAC GAG-CGCTGC C-GTCCCGGA CTCTCCTCCG
                        GGTCCGCGGG CGGGCGGAAG TTCTCCGTAC GAG-CGCTGC C-GTCCCGGA CTCTCCTCCG
                        TGGC-CTAGG CTGGCGGTCC GCCGAAAGGC GAG-CACTGC C-GTCCTGGT CTCTCCTTCG
                        gggc-ccggg ccggcggtcc gccgcgaggc gag-cactgc c-cacccgga gccccgcccg
                        gggc-ctagg ctcgcggtcc gccgcaaggc gtg-tactgc c-gtccaggc ctttctctcg
                        GGGC-CTAGG CTCGCGGTCC GTCGCAAGGC GTGTCACTGC CCGTCCTGGC CTTTCTCTCG
                        GGGC-CTAGG CTCGCGGTCC GCCGCAAGGC GTGTTACTGC CCGTCCTGGC CTTTCTCTCG
                        gggc-gcagg ctggcggtcc gccgcaaggc gcg-cactgc c-g-cctggc cttcctctcg
                        gggc-gcagg ctggcggtcc gccgcaaggc gcg-cactgc c-g-cctggc cttcctctcg
                        gggc-gcagg ccggcggtcc gScgcaaggc gcg-cactgc Y-g-cctggc cttcctctcg
                        gggY-ccRgg tcggcggtcc gccgcRaggc gcg-cactgc c-K-cctggc cttcctctcg
                        GGGT-CCAGG TCGGCGGTCC GCCGCAAGGC GCG-CACTGC C-CTCCTGGC CTTCCTCTCG
                        gggctgcagg tcggcggtcc gccgcaaggc gcg-cactgc c-g-cctggc cttcctctcg
                        gggctgcagg ccggcggtcc gccgcgaggc gcg-cactgc c-g-cctggc cttcctctcg
                        gggc-gcagg cYggcggtcc gccgcRaggc gcg-cactgc c-g-cctggc cttcctctcg
                        gggc-gcagg ctggcggtcc gccgcaaggc gcg-cactgc c-g-cctggc cttcctctcg
                        gggc-gtagg ctgagggtcc ctcgcaaggg gtg-cacctc t-gacctggc ctccctcgcg
                        gggc-ttagg ctaacggtcc ctcgcaaggg gtg-cactgt t-gagctagc ctccctcgcg
                        gggc-ttagg ctaacggtcc ctcgcaaggg gtg-cactgt t-gacctagc ctccctcgcg
                        gggc-ttggg ctgagggtcc gtcgtaaggg gtg-cactct g-gtaccagc ctccctcgcg
                        gggc-ttagg ctaacggtcc ctcgcaaggg gtg-cactgt t-gacctagc ctccctcgcg
                        gggc-atggg cggagggtcc ctcgtaaggg gtg-cactct g-gttccatc ctccctcgcg
                        gggc-gtagg ctgagggtcc ctcgcaaggg gtg-cacctc t-gacctggc ctccctcgcg
                        GGGC-CCAGG CCTGCGGTCC GCCGCGAGGC GTG-CACTGC A-GTCCTGGC CTTCCTCTCG
                        gggc-ccagg Cctgcggtcc gccgtgAGGC gAg-tactgc a-gtcctggc cttcctctcg
                        gggc-ccagg cctgcggtcc gccgtgaggc gtg-tactgc a-gtcctggc cttcctctcg
                        GGGC-CCAGG CCTGCGGTCC GCCGCGAGGC GTG-CACTGC A-GTCCTGGC CTTCCTCTCG
                        gggc-ccagg cctgcggtcc gccgtgaggc gtg-tactgc a-gtcctggc cttcctctcg
                        tggt-cgggg cgggcggtcc gccgcgaggc gag-cactgc c-tctccggc cagttattcg
                        tggt-cgggg cgggtggtcc gccgcgaggc gag-cactgc c-atcccggc cagtcctccg
                        tggc-cgggg cgggcggtcc gccgtgaggc gag-aactgc c-ttcccgac cagtcatccg

                        GTCCTCTCCC GGTGCTCTTG GTTGAGTGTC GGGGGCGGCC GGAACGTTTA CTTTGAAGAA
                        GTCCTCTCCC GGTGCTCTTG GTTGAGTGTC GGGGGCGGCC GGAACGTTTA CTTTGAAGAA
                        GTGCTCCCCC GGTGCTCTTA GCTGAGTGCC GGGGGTGGCC GGAACGTTTA CTTTGAAAAA
                        gtccacggcc ggtgctcttc gccgggtgtc ggtcgcggcc ggaacgttta ctttgaagaa
                        gttttcactc ggtgctcttg attgagtggc gagggtgacc ggaacgttta ctttgaaaaa
                        GTTTTCACCC GGTGCTCTTG ATTGAGTGGC GGGGGTGACC GGAACGTTTA CTTTGAAAAA
                        TTTTTCACCC GGTGCTCTTG ACTGATTGGC TGGGGTGACC GGAACGTTTA CTTTGAAAAA
                        gtctccgccc ggttctcttg actgagtgcc gggcgcggcc gaaacgttta ctttgaaaaa
                        gtctccgctc ggttctcttg actgagtgcc gggcgcggcc gaaacgttta ctttgaaaaa
                        gtctccgYcY ggttctcttg actgagtgcc gggcgcggcc gaaacgttta ctttgaaaaa
                        gtYKYtSYcc ggttctcttg actgagtgcc ggtcgcggcc ggcacgttta ctttgaaaaa
                        GTTGTTTCCC GGTTCTCTTG ACTGAGTGCC GGTCGCGGCC GGCACGTTTA CTTTGAAAAA
                        gtctgcgtcc ggttctcttg actgagtgcc gggcgcggcc gaaacgttta ctttgaaaaa
                        gtctgcgtcc ggttctcttg actgagtgcc gggcgcggcc gaaacgttta ctttgaaaaa
                        gtctccgccc ggttctcttg actgagtgcc gagcgcggcc gaMacgttta ctttgaaaaa
                        gtctccgccc ggttctcttg actgagtgcc gggcgcggcc gaaacgttta ctttgaaaaa
                        gtttgcgctc ggttctcttg attgagtgcc gagtgctacc ggaacgttta ctttgaaaaa
                        gtttgcgccc ggttctctta actgagtgcc gggtgcgacc ggaacgttta ctttgaaaaa
                        gtttgcgccc ggttctctta actgagtgcc gggtgcgacc ggaacgttta ctttgaaaaa
                        gcttgcgccc ggttctctta actgagtccc gggtgcggcc ggaacgttta ctttgaaaaa
                        gtttgcgccc ggttctctta actgagtgcc gggtgcgacc ggaacgttta ctttgaaaaa
                        gcttgcgccc ggttctctta actgagtgcc gggtgcggcc ggaacgttta ctttgaaaaa
                        gtttgcgctc ggttctctta attgagtgcc gagtgctacc ggaacgttta ctttgaaaaa
                        GTTTTCGCCC GGTGCTCTTA ACTGAGTGCC AGGAGGGGCC GGTACGTTTA CTTTGAAAAA
                        gttttcgccc ggtgctctta actgagtgcc aggagaggcc ggaacgttta ctttgaaaaa
                        gttttcgccc ggtgccctta attgagtgcc aggagaggcc ggaacgttta ctttgaaaaa
                        GTTTTCGCCC GGTGCTCTTG ACTGAGTGCC AGGAGGGGCC GGAACGTTTA CTTTGAAAAA
                        gttttcgccc ggtgccctta attgagtgcc aggagaggcc ggaacgttta ctttgaaaaa
                        gtcggcgtgc ggtgctctta actgagtgcc gtgcgaggct gaaacgttta ctttgagaaa
                        gttggcgtgc ggtgctctta Rctgagtgcc gtgcgagact ggaacgttta ctttgagaaa
                        gttgacgtgc ggtgctctta actgagtgcc gtgcgagact ggaacgttta ctttgagaaa

                        ATTAGAGTGT TCAAAGCAGG CCGCCACGCC TGGATAGTCC AGCATGGAAT AATGGAATAG
                        ATTAGAGTGT TCAAGGCAGG CCGTGACGCC CGGATAGTCC AGCATGGAAT AATGGAATAG
                        ATTAGAGTGT TCAAAGCAGG CCCCGACGCC TGAATAGTCC AGCATGGAAT AATGGAATAG
                        aacagagtgt tcaaagcggg ccgcaacgcc ggtacgctcg agcatggaat aatggaacag
                        attagagtgt tcaaagcagg ccat-acgcc tgaatagcag agcatggaat aatggaatag
                        ATTAGAGTGT TCAAAGCAGG CCAT-ACGCC TGAATAGCAG AGCATGGAAT AATGGAATAG
                        ATTAGAGTGT TCAAAGCAGG CCAT-ACGCC TGAATAGCAG AGCATGGAAT AATGGAATAG
                        attggagtgt tcaaagcagg ccgt-gagcc tggacagcag agcatggaat aatggaatag
                        attggagtgt tcaaagcagg ccgt-gagcc tggacagcag agcatggaat aatggaatag
                        attggagtgt tcaaagcagg ccSY-gagcc tggacagcag agcatggaat aatggaatag
                        attggagtgt tcaaagcagg cctc-gcgcc cgaacaccag agcatggaat aatggaatag
                        ATTGGAGTGT TCAAAGCAGG CCACGGCGCC CGAACACCAG AGCATGGAAT AATGGAATAG
                        attggagtgt tcaaagcagg ccgccgcgcc tggacagcag agcatggaat aatggaatag
                        attggagtgt tcaaagcagg ccgccgcgcc tggacagcag agcatggaat aatggaatag
                        attggagtgt tcaaagcagg ccRW-ccgcc YgSacagcag agcatggaat aatggaatag
                        attggagtgt tcaaagcagg ccgc-gcgcc tggacagcag agcatggaat aatggaatag
                        attggagtgt tcaaagcagg cgtaacagcc tgaacagcag agcatggaat aatggaatag
                        attggagtgt tcaaagcagg cgcaacagcc tgaacagcag agcatggaat aatggaatag
                        attggagtgt tcaaagcagg cgcaacagcc tgaacagcag agcatggaat aatggaatag
                        attggagtgt tcaaagcagg cgcaacagcc tgaacagtag agcatggaat aatggaatag
                        attggagtgt tcaaagcagg cgcaacagcc tgaacagcag agcatggaat aatggaatag
                        attggagtgt tcaaagcagg cgtagcagcc tgaacagtag agcatggaat aatggaatag
                        attggagtgt tcaaagcagg cgtaacagcc tgaacagcag agcatggaat aatggaatag
                        ATTGGAGTGT TCAAAGCAGG CCTC-GCGCC TGAACAGTAG AGCATGGAAT AATGGAATAG
                        attggagtgt tcaaagcagg cctc-gcgcc tgaacagcag agcatggaat aatggaatag
                        attggagtgt tcaaagcagg cctc-gcgcc tgaacagcag agcatggaat aatggaatag
                        ATTGGAGTGT TCAAAGCAGG CCTC-GCGCC TGAACAGTAG AGCATGGAAT AATGGAATAG
                        attggagtgt tcaaagcagg cctc-gcgcc tgaacagcag agcatggaat aatggaatag
                        attggagtgt tcaaagcagg ccaaagtgcc cgaacagctc agcatagaat agtggaaaag
                        attggagtgt tcaaagcagg cccaagtgcc cgaacagctc agcatggaat agtggaacag
                        attggagtgt tcaaagcagg ccaaagtgcc cgaacagctc agcatggaat aatgaaacag

                        GACCTCGGTC CCATTGCGTT GGTCTTAGGA AYGCGAGGTA ATGATCGAGA GGGAC-GACG
                        GACCTCGGTC CCATTGCGTT GGTCTTCGGA ACGCGAGGTA ATGATCGAGA GGGACTGACG
                        GACCTCGGTT CTATTGCGTT GGTTTTCGGA ACGCGAGGTA ATGATTAAGA GGGACTGACG
                        ggcctcggcg ctgttgcgtt ggttttcggc acgcgaggca atgatcgaga gggactgacg
                        gaccttggtt ctattgcgtt ggttttcgga actcgaggta atgattaaga gggactgacg
                        GACCTTGGTT CTATTGCGTT GGTTTTCGGA ACTCGAGGTA ATGATTAAGA GGGACTGACG
                        GACCTCGGTT CTATTGCGTA GGTTTTCGGA ACTCGAGGTA ATGATTAAGA GGGACTGACG
                        gacctcggtt ctattgcgtt ggttttcgga actcgaggta atgattaaga gggactgacg
                        gacctcggtt ctattgcgtt ggttttcgga actcgaggta atgattaaga gggactgacg
                        gacctcggtt ctattgcgtt ggttttcgga Wctcgaggta atgattaaga gggactgacg
                        gacctcggtt ctattgcgtt ggtctgcgga actcgaggaa atgattaaga gggactgacg
                        GACCTCGGTT CTATTGCGTT GGTTTKCGGA ACTCGAGGAA ATGATTGAGA GGGACTGAC?
                        gacctcggtt ctattgcgtt ggttttcgga actcgaggta atgattRaga gggactgacg
                        gacctcggtt ctattgcgtt ggttttcgga actcgaggta atgattaaga gggactgacg
                        gacctcggtt ctattgcgtt ggttttcgga actcgaggta atgattaaga gggactgacg
                        gacctcggtt ctattgcgtt ggttttcgga actcgaggta atgattaaga gggactgacg
                        gacctcggtt ctattgcgtt ggttttaaga gttcgaggta atgattaaga gggactgacg
                        gacctcggtt ctattgcgtt ggttttcgga gtccgaggta atgattgaga gggactgacg
                        gacctcggtt ctattgcgtt ggttttcgga gtccgaggta atgattgaga gggactgacg
                        gacctcggtt ctattgcgtt ggttttaaga gtccgaggta atgattcaca gggactgacg
                        gacctcggtt ctattgcgtt ggttttMgga gtccgaggta atgattgaga gggactgacg
                        gacctcggtt ctattgcgtt ggttttaaga gtccgaggta atgattgaga gggactgacg
                        gacctcggtt ctattgcgtt ggttttaaga gttcgaggta atgattaaga gggactgacg
                        GACCTCGGTT CTATTGCGTT GGTTTTCGGA ACTCGAGGTA ATGATTAAGA GGGACTGACG
                        gacctcggtt ctattgcgtt ggttttcgga actcgaggta atgattaaga gggactgacg
                        gacctcggtt ctattgcgtt ggttttcgga actcgaggta atgattaaga gggactgacg
                        GACCTCGGTT CTATTGCGTT GGTTTTCGGA ACTCGAGGTA ATGATTAAGA GGGACTGACG
                        gacctcggtt ctattgcgtt ggttttcgga actcgaggta atgattaaga gggactgacg
                        gacctcggct ctatttcgtt ggtctctgga acctgaggta atgatcaaga gggactgccg
                        gacctcggtt ctatttcgtt ggtctttaga tccagaggta atgatcaaga gggactgccg
                        gaccttggtt ctattttgtt ggtctaaggg accggaggta atgatcaaga gggactgccg

                        GGGGCATTCG TATTGCGGCG TTAGAGGTGA AATTCTTGGA TCGTCGCAAG ACGGAC-GAC
                        GGGGCATTCG TATTGCGGCG TTAGAGGTGA AATTCTTGGA TCGTCGCAAG ACGGAC-GAC
                        GGGGCATCCG TATTGCGGCG TTAGAGGTGA AATTCTTAGA TCGTCGCAAG ACGAAC-AAC
                        ggggcattcg tactgcggcg ctagaggtga aattctcgga ccgccgcaag acggacgaac
                        ggggcattcg tattgcggtg tgagaggtga aattcttgga tcgccgcaag acg-accgac
                        GGGGCATTCG TATTGCGGTG TGAGAGGTGA AATTCTTGGA TCGCCGCAAG ACG-ACCGAC
                        GGGGCATTCG TATTGCGGTG TGAGAGGTGA AATTCTTGGA TCGCCGCAAG ACG-ACCGAC
                        ggggcattcg tattgcggtg tgagaggtga aattcttgga tcgccgcaag acg-accgac
                        ggggcattcg tattgcggtg tgagaggtga aattcttgga tcgccgcaag acg-accgac
                        ggggcattcg tattgcggtg tgagaggtga aattcttgga tcgccgcaag acg-accgac
                        ggggcattcg tactgcggtg tgagaggtga aattcttgga tcgccgcaag acg-tccgac
                        GGGGCATTCG TACTGCGGTG TGAGAGGTGA AATTCTTGGA TCGCCGCAAG ACG-TCCGAC
                        ggggcattcg tattgcggtg tgagaggtga aattcttgga tcgccgcaag acg-accgac
                        ggggcattcg tattgcggtg tgagaggtga aattcttgga tcgccgcaag acg-accgac
                        ggggcattcg tactgcggtg tgagaggtga aattcttgga tcgccgcaag acg-accgac
                        ggggcattcg tattgcggtg tgagaggtga aattcttgga tcgccgcaag acg-accgac
                        ggggcattcg tattgcggtg tgagaggtga aattctagga tcgccgcaag acg-accgac
                        ggggcattcg tattgcggtg tgagaggtga aattcttgga tcgccgcaag acg-accgac
                        ggggcattcg tattgcggtg tgagaggtga aattcttgga tcgccgcaag acg-accgac
                        ggggcattcg tattgcggtg tgagaggtga aattcttgg- tcgccgcaag acg-accggt
                        ggggcattcg tattgcggtg tgagaggtga aattcttgga tcgccgcaag acg-accgac
                        ggggcattcg tattgcggtg tgagaggtga aattcttgga tcgccgcaag acg-accggt
                        ggggcattcg tattgcggtg tgagaggtga aattctagga tcgccgcaag acg-accgac
                        GGGGCATTCG TATTGCGGTG TGAGAGGTGA AATTCTTGGA TCGCCGCAAG ACG-ACCGAC
                        ggggcattcg tattgcggtg tgagaggtga aattcttgga tcgccgcaag acg-accgac
                        ggggcattcg tattgcggtg tgagaggtga aattcttggA tcgccgcaAg Acg-accgac
                        GGGGCATTCG TATTGCGGTG TGAGAGGTGA AATTCTTGGA TCGCCGCAAG ACG-ACCGAC
                        ggggcattcg tattgcggtg tgagaggtga aattcttgga tcgccgcaag acg-accgac
                        ggggcattcg tattgcggcg tgagaggtga aattcttgga tcgtcgcaag acg-cccgac
                        ggggcattcg tattgcggcg tgagaggtga aattcttgga tcgtcgcaag acg-cccgac
                        ggggcattcg tattgcggcg tgagaggtga aattcttgga tcgtcgcaag acg-ccctac

                        TGCGAAAGCA TTTGCCAAGA AYGTTTTCAT TGATCAAGAA CGAAAGTCGG AGGTTCGAAG
                        TGCGAAAGCA TTTGCCAAGA ATGTTTTCAT TGATCAAGAA CGAAAGTCGG AGGTTCGAAG
                        TGCGAAAGCA TTTGCCAAGA ATGTTTTCAT TAATCAAGAA CGAAAGTTAG AGGTTCGAAG
                        tgcgaaagca tttgccaagc atgttttcat tgatcaagaa cgaaagttag agtttcgaag
                        tgcgaaagca tttgccaaga atgttttcat taatcaagaa cgaaagttag aggttcgaag
                        TGCGAAAGCA TTTGCCAAGA ATGTTTTCAT TAATCAAGAA CGAAAGTTAG AGGTTCGAAG
                        TGCGAAAGCA TTTGCCAAGA ATGTTTTCAT TAATCAAGAA CGAAAGTTAG AGGTTCGAAG
                        tgcgaaagca tttgccaaga atgttttcat taatcaagaa cgaaagttag aggttcgaag
                        tgcgaaagca tttgccaaga atgttttcat taatcaagaa cgaaagttag aggttcgaag
                        tgcgaaagca tttgccaaga atgttttcat taatcaagaa cgaaagttag aggttcgaag
                        tgcgaaagca tttgccaaga atgttttcat taatcaagaa cgaaagttag aggttcgaag
                        TGCGAAAGCA TTTGCCAAGA ATGTTTTCAT TAATCAAGAA CGAAAGTTAG AGGTTCGAAG
                        tgcgaaagca tttgccaaga atgttttcat taatcaagaa cgaaagttag aggttcgaag
                        tgcgaaagca tttgccaaga atgttttcat taatcaagaa cgaaagttag aggttcgaag
                        tgcgaaagca tttgccaaga atgttttcat taatcaagaa cgaaagttag aggttcgaag
                        tgcgaaagca tttgccaaga atgttttcat taatcaagaa cgaaagttag aggttcgaag
                        agcgaaagca tttgccaaga atgtcttcat taatcaagaa cgaaagttag aggttcgaag
                        agcgaaagca tttgccaaga atgtcttcat taatcaagaa cgaaagttag aggttcgaag
                        agcgaaagca tttgccaaga atgtcttcat taatcaagaa cgaaagttag aggttcgaag
                        agcgaaacg- tttgccaaga atgtattcat tgatcaagaa cgaaagttac aggttcgaag
                        agcgaaagca tttgccaaga atgtcttcat taatcaagaa cgaaagttag aggttcgaag
                        agcgaaagcg tttgccaaga atgtcttcat tgatcaagaa cgaaagttag aggttcgaag
                        agcgaaagca tttgccaaga atgtcttcat taatcaagaa cgaaagttag aggttcgaag
                        TGCGAAAGCA TTTGCCAAGA ATGTTTTCAT TAATCAAGAA CGAAAGTTAG AGGTTCGAAG
                        tgcgaaaGCa tttgccaaga atgttttcat taatcaagaa cgaaagttag aggttcgaag
                        Tgcgaaagca tttgccaaga atgttttcat taatcaagaa cgaaagttag aggttcgaag
                        TGCGAAAGCA TTTGCCAAGA ATGTTTTCAT TAATCAAGAA CGAAAGTTAG AGGTTCGAAG
                        tgcgaaagca tttgccaaga atgttttcat taatcaagaa cgaaagttag aggttcgaag
                        agcgaaagca tttgccaaga atgtcttcat tgatcaagaa cgaaagtcgg aggatcgaag
                        agcgaaagca tttgccaaga atgtcttcat tgatcaagaa cgaaagtcgg aggatcgaag
                        agcgaaagca tttgccaaga atgtcttcat tgatcaagaa cgaaagtcgg aggatcgaag

                        ACGATCAGAT ACCGTCCTAG TTCCGACCGT AAACGATGTC GACTGGCGAT CTGCCGGCGT
                        ACGATCAGAT ACCGTCCTAG TTCCGACCGT AAACGATGCC GACTGGCGAT CTGCCGGCGT
                        ACGATCAGAT ACCGTCCTAG TTCTAACCAT AAACGATGCC GACTGGCGAT CCGCCGGCGT
                        acgattagat accgtcgtag ttctaaccgt aaacgatgcc gactggctat ccgccggcga
                        gcgatcagat accgccctag ttctaaccat aaacgatgcc gactggcgat ccgccggcgt
                        GCGATCAGAT ACCGCCCTAG TTCTAACCAT AAACGATGCC GACTGGCGAT CCGCCGGCGT
                        GCGATCAGAT ACCGCCCTAG TTCTAACCAT AAACGATGCC GACTGGCGAT CCGCCGGCGT
                        gcgatcagat accgccctag ttctaaccat aaacgatgcc gactggcgat ccgccggcgt
                        gcgatcagat accgccctag ttctaaccat aaacgatgcc gactggcgat ccgccggcgt
                        gcgatcRgat accgccctag ttctaaccat aaacgatgcc gactggcgat ccgccggcgt
                        gcgatcagat accgccctag ttctaaccat aaacgatgcc gactggcgat ccgccggcgt
                        GCGATCAGAT ACCCGCCTAG TTCTAACCAT AAACGATGCC GCCTGTCGTT CCGCCGGCGT
                        gcgatcagat accgccctag ttctaaccat aaacgatgcc gactggcgat ccgccggcgt
                        gcgatcagat accgccctag ttctaaccat aaacgatgcc gactggcgat ccgccggcgt
                        gcgatcagat accgccctag ttctaaccat aaacgatgcc gactggcgat ccgccggcgt
                        gcgatcagat accgccctag ttctaaccat aaacgatgcc gactggcgat ccgccggcgt
                        gcgatcagat accgccctag ttctaaccat aaactatgcc gaccggcgat tcgccggcgt
                        gcgatcagat accgccctag ttctaaccat aaactatgcc gaccggcgat tcgccggcgt
                        gcgatcagat accgccctag ttctaaccat aaactatgcc gaccggcgat tcgccggcgt
                        gcgatacgat accgccctag ttctaaccat aaactatgcc gaccg-cgat t-gccg-cgt
                        gcgatcagat accgccctag ttctaaccat aaactatgcc gaccggcgat tcgccggcgt
                        gcgatcagat accgccctag ttctaaccat aaactatgcc gaccggcgat tcgccggcgt
                        gcgatcagat accgccctag ttctaaccat aaactatgcc gaccggcgat tcgccggcgt
                        GCGATCAGAT ACCGCCCTAG TTCTAACCAT AAACGATGCC GACTGACGAT CCGCCGGCGT
                        gcgatcagat accgccctag ttctaaccat aaacgatgcc gactgacgat ccgccggcgt
                        gcgatcagat accgccctag ttctaaccat aaacgatgcc gactgacgat ccgccggcgt
                        GCGATCAGAT ACCGCCCTAG TTCTAACCAT AAACGATGCC GACTGACGAT CCGCCGGCGT
                        gcgatcagat accgccctag ttctaaccat aaacgatgcc gactgacgat ccgccggcgt
                        gcgatcagat accgccctag ttccgaccat aaacgatacc gacccgtaat tcgccggcgt
                        gcgatcagat accgccctag ttccgaccat aaacgatacc aactcRtaat tcgccggcgt
                        gcgatcagat accgccctag ttccgaccat aaacgatacc aactcgcaat ccgccggcgt

                        TACTCTCTAG ACCCGGCGGG CAGCCTYCGG GAAACCAAAG TCTTTGGGTT CCGGGGGAAG
                        TACTCTCAAG ACCCGGCTGG CAGCCTCCGG GAAACCAAAG TCTTTGGGTT CCGGGGGAAG
                        TACTCCCATG ACCTGGCGGG CAGCTTCCGG GAAACCAAAG TCTTTGGGTT CCGGGGGAAG
                        ttatctcacg accctgtggg cagctcccgg gaaacccaag tgcacgggtt ccgggggaag
                        tactccaatg acgcggcggg cagtctacgg gaaaccaaag tctttgggtt ccgggggaag
                        TACTCCAATG ACGCGGCGGG CAGTCTACG? GAAACCAAAG TCTTTGGGTT CCGGGGGAAG
                        TACTCCAATG ACGCGGCGGG CAGTCTACGG -AAACCAAAG TCTTTGGGTT CCGGGGGAAG
                        tactccaatg acgcggcggg cagtctgcgg gaaaccaaag tctttgggtt ccgggggaag
                        tactYcaatg acgcggcggg cagtctgcgg gaaaccaaag tctttgggtt ccgggggaag
                        tactccaatg acgcggcggg cagtctgcgg gaaaccaaag tctttgggtt ccgggggaag
                        tactccaatg acgcggcggg cagtctgcgg gaaaccaaag tctttgggtt ccgggggaag
                        ?ACTCCAATC ACGCG?CGGG CAGT?TGCGG TAAACCAAAG TCTTTGGGTT CCGGGGGAAG
                        tactccaatg acgcggcggg cagtctgcgg gaaaccaaag tctttgggtt ccgggggaag
                        tactccaatg acgcggcggg cagtctgcgg gaaaccaaag tctttgggtt ccgggggaag
                        tactccaatg acgcggcggg cagtctgcgg gaaaccaaag tctttgggtt ccgggggaag
                        tactccaatg acgcggcggg cagtctgcgg gaaaccaaag tctttgggtt ccgggggaag
                        tactccaatg acacggcagg cagcccccgg gaaaccaaag tgtttgggtt ccgggggaag
                        tactccaatg acacggctag cagcttccgg gaaaccaaag tttttgggtt ccgggggaag
                        tactccaatg acacggctag cagcttccgg gaaaccaaag tttttgggtt ccgggggaag
                        tatatcaatg acacggcaag cagcttccgg gaaaccaaag tttttgggtt ccgggggaag
                        tactccaatg acacggctag cagcttccgg gaaaccaaag tttttgggtt ccgggggaag
                        tatatcaatg ac?cggcaag cagcttccgg gaaaccaaag tttttgggtt ccgggggaag
                        tactccaatg acacggcagg cagcccccgg gaaaccaaag tgtttgggtt ccgggggaag
                        TACTCCCATG ACGCGGCGGG CAGTCTGAGG GAAACCAAAG TCTTTGGGTT CCGGGGGAAG
                        tactcccatg acgcggcggg cagtctaagg gaaaccaaag tctttgggtt ccgggggaag
                        tactcccatg acgcggcggg cagtctaagg gaaaccaaag tctttgggtt ccgggggaag
                        TACTCCCATG ACGCGGCGGG CAGTCTGAGG GAAACCAAAG TCTTTGGGTT CCGGGGGAAG
                        tactcccatg acgcggcggg cagtctaagg gaaaccaaag tctttgggtt ccgggggaag
                        tcctcccatg acgcggcggg caatctccgg gaaaccaaag tttttgggtt ccgggggaag
                        tcctcccatg acgcggcggg caatcYccgg aaaaccaaag tctttgggtt ccgggggaag
                        tcctcccatg acgcggcggg cagcct-cgg gaaaccaaag tctttgggtt ccgggggaag

                        TATGGTTGCA AAGCTGAAAC TTAAAGGAAT TGACGGAAGG GCACCACCAG GAGTGGAGCC
                        TATGGTTGCA AAGCTGAAAC TTAAAGGAAT TGACGGAAGG GCACCACCAG GAGTGGAGCC
                        TATGGTTGCA AAGCTGAAAC TTAAAGGAAT TGACGGAAGG GCACCACCAG GAGTGGAGCC
                        tatggttgca aagctgaaac ttaaaggaat tgacggaagg gcaccaccag gagtggagcc
                        tatggttgca aagctgaaac ttaaaggaat tgacggaagg gcaccaccag gcgtggagcc
                        TATGGTTGCA AAGCTGAAAC TTAAAGGAAT TGACGGAAGG GCACCACCAG GCGTGGAGCC
                        TATGGTTGCA AAGCTGAAAC TTAAAGGAAT TGACGGAAGG GCACCACCAG GCGTGGAGCC
                        tatggttgca aagctgaaac ttaaaggaat tgacggaagg gcaccaccag gagtggagcc
                        tatggttgca aagctgaaac ttaaaggaat tgacggaagg gcaccaccag gagtggagcc
                        tatggttgca aagctgaaac ttaaaggaat tgacggaagg gcaccaccag gagtggagcc
                        tatggttgca aagctgaaac ttaaaggaat tgacggaagg gcaccaccag gagtggagcc
                        TATGGTTGCA AAGCTGAAGC TTAAAGGAAT TGACGGAAGG GCACCACCAC GAGTGGAGCC
                        tatggttgca aagctgaaac ttaaaggaat tgacggaagg gcaccaccag gagtggagcc
                        tatggttgca aagctgaaac ttaaaggaat tgacggaagg gcaccaccag gagtggagcc
                        tatggttgca aagctgaaac ttaaaggaat tgacggaagg gcaccaccag gagtggagcc
                        tatggttgca aagctgaaac ttaaaggaat tgacggaagg gcaccaccag gagtggagcc
                        tatggttgca aagctgaaac ttaaaggaat tgacggaagg gcaccaccag gagtggagcc
                        tatggttgca aagctgaaac ttaaaggaat tgacggaagg gcaccaccag gagtggagcc
                        tatggttgca aagctgaaac ttaaaggaat tgacggaagg gcaccaccag gagtggagcc
                        tatggttgca aagctgaaac ttaaaggaat tgacggaagg gcaccaccag gagtg-agc-
                        tatggttgca aagctgaaac ttaaaggaat tgacggaagg gcaccaccag gagtggagcc
                        tatggttgca aagctgaaac ttaaaggaat tgacggaagg gcaccaccag gagtggagcc
                        tatggttgca aagctgaaac ttaaaggaat tgacggaagg gcaccaccag gagtggagcc
                        TATGGTTGCA AAGCTGAAAC TTAAAGGAAT TGACGGAAGG GCACCACCAG GAGTGGAGCC
                        tatggttgca aagctgaaac ttaaaggaat tgacggaagg gcaccaccag gagtggagcc
                        tatggttgca aagctgaaac ttaaaggaat tgacggaagg gcaccaccag gagtggagcc
                        TATGGTTGCA AAGCTGAAAC TTAAAGGAAT TGACGGAAGG GCACCACCAG GAGTGGAGCC
                        tatggttgca aagctgaaac ttaaaggaat tgacggaagg gcaccaccag gagtggagcc
                        tatggttgca aagctgaaac ttaaaggaat tgacggaagg gcaccaccag gagtggagcc
                        tatggttgca aagctgaaac ttaaaggaat tgacggaagg gcaccaccag gagtggagcc
                        tatggttgca aagctgaaac ttaaaggaat tgacggaagg gcaccaccag gagtggagcc

                        TGCGGCTTAA TTTGACTCAA CACGGGAAAA CTCACCCGGC CCGGACACGG CGAGGATTGA
                        TGCGGCTTAA TTTGACTCAA CACGGGAAAA CTCACCCGGC CCGGACACGG CGAGGATTGA
                        TGCGGCTTAA TTTGACTCAA CACGGGAAAA CTCACCCGGC CCGGACACAG TTAGGATTGA
                        tgcggcttaa tttgactcaa cacggggaaa cttacccggc ccggacacgg cgaggattga
                        tgcggcttaa tttgactcaa cacgggaaaa ctcacccggc ccggacacag tgaggattga
                        TGCGGCTTAA TTTGACTCAA CACGGGAAAA CTCACCCGGC CCGGACACAG TGAGGATTGA
                        TGCGGCTTAA TTTGACTCAA CACGGGAAAA CTCACCCGGC CCGGACACAG TGAGGATTGA
                        tgcggcttaa tttgactcaa cacggggaaa ctcacccggc ccggacacag tgaggattga
                        tgcggcttaa tttgactcaa cacggggaaa ctcacccggc ccggacacag tgaggattga
                        tgcggcttaa tttgactcaa cacgggRaaa ctcacccggc ccggacacag tgaggattga
                        tgcggcttaa tttgactcaa cacgggaaaa ctcacccggc ccggacacag tgaggattga
                        TGCGGCTTAA TTTGACTCAA CACGGGAAAA CTCACCCGGC CCGGACACAG TGAGGATTGA
                        tgcggcttaa tttgactcaa cacggggaaa ctcacccggc ccggacacag tgaggattga
                        tgcggcttaa tttgactcaa cacggggaaa ctcacccggc ccggacacag tgaggattga
                        tgcggcttaa tttgactcaa cacggggaaa ctcacccggc ccggacacag tgaggattga
                        tgcggcttaa tttgactcaa cacggggaaa ctcacccggc ccggacacag tgaggattga
                        tgcggcttaa tttgactcaa cacgggaaaa ctcacccggc ccggacacag taaggattga
                        tgcggcttaa tttgactcaa cacgggaaaa ctcacccggc ccggacacag taaggattga
                        tgcggcttaa tttgactcaa cacgggaaaa ctcacccggc ccggacacag taaggattga
                        tgcg-cttaa tttgactcaa cacgggaaaa ctcacccggc ccggacacag taaggattga
                        tgcggcttaa tttgactcaa cacgggaaaa ctcacccggc ccggacacag taaggattga
                        tgcggcttaa tttgactcaa cacgggaaaa ctcacccggc ccggacacag taaggattga
                        tgcggcttaa tttgactcaa cacgggaaaa ctcacccggc ccggacacag taaggattga
                        TGCGGCTTAA TTTGACTCAA CACGGGGAAA CTCACCCGGC CCGGACACAG TGAGGATTGA
                        tgcgGcttaa tttgactcaa cacgggaaaa ctcacccggc ccggAcacag tgaggattga
                        tgcggcttaa tttgactcaa cacgggaaaa ctcacccggc ccggacacag tgaggattga
                        TGCGGCTTAA TTTGACTCAA CACGGGGAAA CTCACCCGGC CCGGACACAG TGAGGATTGA
                        tgcggcttaa tttgactcaa cacgggaaaa ctcacccggc ccggacacag tgaggattga
                        tgcggcttaa tttgactcaa cacggggaaa cctacccggc ccggacacag taaggattga
                        tgcggcttaa tttgactcaa cacggggaaa cctacccggc ccggacacag tgaggattga
                        tgcggcttaa tttgactcaa cacggggaaa cctacccggc ccggacacag taaggattga

                        CAGATTGAGA GCTCTTTCTT GATTTCGTGG GTGGTGGTGC ATGGCCGTTC TTAGTTGGTG
                        CAGATTGAGA GCTCTTTCTT GATTTCGTGG GTGGTGGTGC ATGGCCGTTC TTAGTTGGTG
                        CAGATTGAGA GCTCTTTCTC GATTCTGTGG GTGGTGGTGC ATGGCCGTTC TTAGTTGGTG
                        cagatcgaga gctctttcta gattccgtgg gtggtggtgc atggccgttc ttagttggtg
                        cagattgaga gctctttctt gattttgtgg gtggtggtgc atggccgttc ttagttggtg
                        CAGATTGAGA GCTCTTTCTT GATTTTGTGG GTGGTGGTGC ATGGCCGTTC TTAGTTGGTG
                        CAGATTGAGA GCTCTTTCTT GATTTTGTGG GTGGTGGTGC ATGGCCGTTC TTAGTTGGTG
                        cagattgaga gctctttctt gattctgtgg gtggtggtgc atggccgttc ttagttggtg
                        cagattgaga gctctttctt gattctgtgg gtggtggtgc atggccgttc ttagttggtg
                        cagattgaga gctctttctt gattctgtgg gtggtggtgc atggccgttc ttagttggtg
                        cagattgaga gctctttctc gattctgtgg gtggtggtgc atggccgttc ttagttggtg
                        CAGATTGAGA GCTCTTTCTC GATTCTGTGG GTGGTGGTGC ATGGCCGTTC TTAGTTGGTG
                        cagattgaga gctctttctt gattctgtgg gtggtggtgc atggccgttc ttagttggtg
                        cagattgaga gctctttctt gattctgtgg gtggtggtgc atggccgttc ttagttggtg
                        cagattgaga gctctttctt gattctgtgg gtggtggtgc atggccgttc ttagttggtg
                        cagattgaga gctctttctt gattctgtgg gtggtggtgc atggccgttc ttagttggtg
                        cagattgaga gctctttctt gattctgtgg gtggtggtgc atggccgttc ttagttggtg
                        cagattgaga gctctttctt gattctgtgg gtggtggtgc atggccgttc ttagttggtg
                        cagattgaga gctctttctt gattctgtgg gtggtggtgc atggccgttc ttagttggtg
                        cagattgaga gctctttctt gattctgtgg gtggtggtgc atggccgttc ttagttggtg
                        cagattgaga gctctttctt gattctgtgg gtggtggtgc atggccgttc ttagttggtg
                        cagattgaga gctctttctt gattctgtgg gtggtggtgc atggccgttc ttagttggtg
                        cagattgaga gctctttctt gattctgtgg gtggtggtgc atggccgttc ttagttggtg
                        CAGATTGAGA GCTCTTTCTT GATTCTGTGG GTGGTGGTGC ATGGCCGTTC TTAGTTGGTG
                        cagattgaga gctctttctt gattctgtgg gtggtggtgc atggccgttc ttagttggtg
                        cagattgaga gctctttctt gattctgtgg gtggtggtgc atggccgttc ttagttggtg
                        CAGATTGAGA GCTCTTTCTT GATTCTGTGG GTGGTGGTGC ATGGCCGTTC TTAGTTGGTG
                        cagattgaga gctctttctt gattctgtgg gtggtggtgc atggccgttc ttagttggtg
                        cagattgaga gctctttctc gattttgtgg atggtggtgc atggccgttc ttagttggtg
                        cagattgaga gctctttctt gattttgtgg atggtggtgc atggccgttc ttagttggtg
                        cagattgaga gctctttctt gattttgtgg atggtggtgc atggccgttc ttagttggtg

                        GAGCGATTTG TCAGGTTGAT TCCGATAACG AACGAGACTC TGGCTTGCTA AATAGTCGTG
                        GAGCGATTTG TCAGGTTGAT TCCGATAACG AACGAGACTC TGGCTTGCTA AATAGTGGCC
                        GAGCGATTTG TCTGGTTAAT TCCGATAACG AACGAGACTC TGGCTTGCTA AATAGTTACG
                        gagcgatttg tctggttaat tccgataacg aacgagactc tggcttgcta aatagtccag
                        gagcgatttg tctggttaat tccgataacg aacgagactc tggcttgcta aatagttgcg
                        GAGCGATTTG TCTGGTTAAT TCCGATAACG AACGAGACTC TGGCTTGCTA AATAGTTGCG
                        GAGCGATTTG TCTGGTTAAT TCCGATAACG AACGAGACTC TGGCTTGCTA AATAGTTGCG
                        gagcgatttg tctggttaat tccgataacg aacgagactc tggcttgcta aatagtcgcg
                        gagcgatttg tctggttaat tccgataacg aacgagactc tggcttgcta aatagtcgcg
                        gagcgatttg tctggttaat tccgataacg aacgagactc tggcttgcta aatagtcKcg
                        gagcgatttg tctggttaat tccgataacg aacgaRactc tggcttgcta aatagtcgcg
                        GAGCGATTTG TCTGGTTAAT TCCGATAACG AACGAGACTC TGGCTTGCTA AATAGTCGCG
                        gagcgatttg tctggttaat tccgataacg aacgagactc tggcttgcta aatagtcgcg
                        gagcgatttg tctggttaat tccgataacg aacgagactc tggcttgcta aatagtcgcg
                        gagcgatttg tctggttaat tccgataacg aacgagactc tggcttgcta aatagtcgcg
                        gagcgatttg tctggttaat tccgataacg aacgagactc tggcttgcta aatagtcgcg
                        gagcgatttg tctggttaat tccgataacg aacgagactc tggcttgcta aatagttgcg
                        gagcgatttg tctggttaat tccgataacg aacgagactc tggcttgcta aatagttgcg
                        gagcgatttg tctggttaat tccgataacg aacgagactc tggcttgcta aatagttgcg
                        gagtgatttg tctggttaat tccgataacg aacgagactc tggcttgcta aatagttgcg
                        gagcgatttg tctggttaat tccgataacg aacgagactc tggcttgcta aatagttgcg
                        gagtgatttg tctggttaat tccgataacg aacgagactc tggcttgcta aatagttgcg
                        gagcgatttg tctggttaat tccgataacg aacgagactc tggcttgcta aatagttgcg
                        GAGCGATTTG TCTGGTTAAT TCCGATAACG AACGAGACTC TGGCTTGCTA AATAGTGGCG
                        gagcgatttg tctggttaat tccgataacg aacgagactc tggcttgcta aatagttgcg
                        gagcgatttg tctggttaat tccgataacg aacgagactc tggcttgcta aatagttgcg
                        GAGCGATTTG TCTGGTTAAT TCCGATAACG AACGAGACTC TGGCTTGCTA AATAGTGGCG
                        gagcgatttg tctggttaat tccgataacg aacgagactc tggcttgcta aatagttgcg
                        gagtgatttg tctggttaat tccgataacg aacgagactc tggcttgcta tatagtccgg
                        gagcgatttg tctggttaat tccgataacg aacgagactc cggcttgcta aatagtccgg
                        gagcgatttg tctggttaat tccgataacg aacgagactc tggcttgcta aatagtctgg

                        CGACCCCTTC CGT-GTCGGC GGACTTCTTA GAGGGACAAG CGGCGTTCAG CCGCCCGAGA
                        CGACACCTTC CGT-GTCGGC CGACTTCTTA GAGGGACAAG CGGCGTTCAG CCGCGCGAGA
                        CGACCCACCG GGTCGGCGTC CAACTTCTTA GAGGGACAAG TGGCGTTTAG CCACGCGAGA
                        gcgggttagc ctcgggcccg cgacttctta gagggacaaR cggcgtccag ccgcgcgaaa
                        ccacccgttg cggtgggcgc taacttctta gagggacaag tggcgtttag ccacgcgaga
                        CCACCCGTTG CGGTGGGCGC TAACTTCTTA GAGGGACAAG TGGCGTTTAG CCACGCGAGA
                        CCACCCGCCG CGGTGGGCTT CAACTTCTTA GAGGGACAAG TGGCGTTTAG CCACGCGAGA
                        ccggccgccg agccgggcgc tgacttctta gagggacaag tggcgttcag ccacgcgaga
                        ccggccgccg cgccgggcgc tgacttctta gagggacaag tggcgttcag ccacgcgaga
                        ccggccgccg YgccgRgcga Sgacttctta gagggacaag tggcgttcag ccacgcgaga
                        ccggccgccg tgccgggcgc tgacttctta gagggacaag tggcgttcag ccacgcgaga
                        CCGGCCGCCG TGCCGGGCGC TGACTTCTTA GAGGGACAAG TGGCGTTCAG CCACGCGAGA
                        ccggccgccg cgccgggcgc tgacttctta gagggacaag tggcgttcag ccacgcgaga
                        ccggccgccg cgccgggcgc tgacttctta gagggacaag tggcgttcag ccacgcgaga
                        ccggccgccg cgccgggcgc tgacttctta gagggacaag tggcgttcag ccacgcgaga
                        ccggccgccg cgccgggcgc tgacttctta gagggacaag tggcgttcag ccacgcgaga
                        ccacccgccg aggtgggcga caacttctta gagggactag tggcgtttag ccacgcgaga
                        ccacccgccg aggtgggcga caacttctta gagggactag tggcgtttag ccacgcgaga
                        ccacccgccg aggtgggcga caacttctta gagggactag tggcgtttag ccacgcgaga
                        ccacccgccg aggtgggcga caacttctta gagggactag tggcgtttag ccacgcgaga
                        ccacccgccg aggtgggcga caacttctta gagggactag tggcgtttag ccacgcgaga
                        ccacccgccg aggtgggcga caacttctta gagggactag tggcgtttag ccacgcgaga
                        ccacccgccg aggtgggcga caacttctta gagggactag tggcgtttag ccacgcgaga
                        CCACCCGCCG CGGTGCGCGT CCACTTCTTA GAGGGACAAG TGGCGTCTAG CCACGCGAGA
                        ccacccgccg cggtgcgcgt caacttctta gagggacaag tggcgtatag ccacgcgaga
                        ccaCccGccg cggtgcgcgt caacttctta gagggacaag tggcgtttaG CCAGGCgaga
                        CCACCCGCCG CGGTGCGCGT CCACTTCTTA GAGGGACAAG TGGCGTCTAG CCACGCGAGA
                        ccacccgccg cggtgcgcgt caacttctta gagggacaag tggcgtatag ccacgcgaga
                        ccacccgtcg tggtgtgccg caacttcata gagggacaaa tggctttcag ccatacgaga
                        ctacccgtcg aggtacgccg caacttctta gagggacaaa tggcttttag ccatacgaga
                        ctacccgtcg cggtaagcca caacttctta gagggacaaa tggctctcag ccatacgaaa

                        TTGAGCAATA ACAGGTCTGT GATGCCCTTA GATGTCCGGG GCCGCACGCG CGCTACACTG
                        TTGAGCAATA ACAGGTCTGT GATGCCCTTA GATGTCCGGG GCCGCACGCG CGCTACACTG
                        TTGAGCAATA ACAGGTCTGT GATGCCCTTA GATGTCCGGG GCCGCACGCG CGCTACACTG
                        tggagcaata acaggtctgt gatgccctta gatgttcggg gccgcacgcg cgctacactg
                        ttgagcaata acaggtctgt gatgccctta gatgttcggg gccgcacgcg cgctacactg
                        TTGAGCAATA ACAGGTCTGT GATGCCCTTA GATGTTCGGG GCCGCACGCG CGCTACACTG
                        TTGAGCAATA ACAGGTCTGT GATGCCCTTA GATGTTCGGG GCCGCACGCG CGCTACACTG
                        ttgagcaata acaggtctgt gatgccctta gatgttcggg gccgcacgcg cgctacactg
                        ttgagcaata acaggtctgt gatgccctta gatgttcggg gccgcacgcg cgctacactg
                        ttgagcaata acaggtctgt gatgccctta gatgttcggg gccgcacgcg cgctacactg
                        ttgagcaata acaggtctgt gatgccctta gatgttcggg gccgcacgcg tgctacactg
                        TTGAGCAATA ACAGGTCTGT GATGCCCTTA GATGTTCGGG GCCGCACGCG TGCTACACTG
                        ttgagcaata acaggtctgt gatgccctta gatgttcggg gccgcacgcg cgctacactg
                        ttgagcaata acaggtctgt gatgccctta gatgttcggg gccgcacgcg cgctacactg
                        ttgagcaata acaggtctgt gatgccctta gatgtccggg gccgcacgcg cgctacactg
                        ttgagcaata acaggtctgt gatgccctta gatgttcggg gccgcacgcg cgctacactg
                        ttgagcaata acaggtctgt gatgccctta gatgttcggg gccgcacgcg cgctacactg
                        ttgagcaata acaggtctgt gatgccctta gatgttcggg gccgcacgcg cgctacactg
                        ttgagcaata acaggtctgt gatgccctta gatgttcggg gccgcacgcg cgctacactg
                        ttgagcaata acaggtctgt gatgccctta gatgttcggg gccgcacgcg cgctacactg
                        ttgagcaata acaggtctgt gatgccctta gatgttcggg gccgcacgcg cgctacactg
                        ttgagcaata acaggtctgt gatgccctta gatgttcggg gccgcacgcg cgctacactg
                        ttgagcaata acaggtctgt gatgccctta gatgttcggg gccgcacgcg cgctacactg
                        TTGAGCAATA ACAGGTCTGT GATGCCCTTA GATGTTCGGG GCCGCACGCG CGCTACACTG
                        ttgagcaata acaggtctgt gatgccctta gatgttcggg gccgcacgcg cgctacactg
                        ttgagcaata acaggtctgt gatgccctta gatgttcggg gccgcacgcg cGCtacactg
                        TTGAGCAATA ACAGGTCTGT GATGCCCTTA GATGTTCGGG GCCGCACGCG CGCTACACTG
                        ttgagcaata acaggtctgt gatgccctta gatgttcggg gccgcacgcg cgctacactg
                        tagagcaata acaggtctgt gatgccctta gatgtccggg gccgcacgcg cgctacactg
                        tggagcaata acaggtctgt gatgccctta gatgtccggg gccgcacgcg cgctacactg
                        tagagcaata acaggtctgt gatgccctta gatgtccggg gccgcacgcg cgctacactg

                        AAGGGATCAG CGGGCCTCCC TGGCCGACAG GACCCAGGCA ATCCGATGAG CCCCCTTCGT
                        AAGGGATCAG CGGGCCCCCC CGGCCGACAG GACCCGGGCA ATCCGATGAA CCCCTCTCGT
                        AAAGAATCAG CGGGCCTCCC TGGCCGCTAG GTCT-GGGTA ATCCGATGAA CCTCTTTCGT
                        aaaagatcaa cgcgtgccct cggccgacag gccc-gggta acctcgggag ccctcttcgt
                        aaagaatcag cgtgtgccct tggccgacag gtct-gggta atccgttgaa cctctttcgt
                        AAAGAATCAG CGTGTGCCCT TGGCCGACAG GTCT-GGGTA ATCCGTTGAA CCTCTTTCGT
                        AAAGAATCAG CGTGTGCCCT TGGCCGACAG GTCT-GGGTA ATCCGTTGAA CCTCTTTCGT
                        aagggatcag cgggcgtcct tgtctggaag gcct-gggca atccgctgaa cccccttcgt
                        aagggatcag cgggcgtcct tgtctggaag gcct-gggca atccgttgaa cctcattcgt
                        aagggatcag cgggcgccct tggccggaag gtct-gggYa atccgttgaa cctcMttcgt
                        aacggatcag cgggcgYcct tggccggaag gtct-gggca atccgctgaa ccccgttcgt
                        AACGGATCAG CGGGCGCCCT TGGCCGGAAG GTCT-GGGCA ATCCGCTGAA CCCCGTTCGT
                        aagggatcag cgggcgccct tggccggaag gtct-gggca atccgctgaa cccccttcgt
                        aagggatcag cgggagccct tggccggaag gtct-gggca atccgctgaa cccccttcgt
                        Raggggtcag cgggt?ccct tggccggaag gtct-gggca atccgttgaa ccccctYcgt
                        aagggatcag cgggcgccct tggccggaag gtct-gggca atccgttgaa cctcattcgt
                        aaggaatcag cgtgttccct tggccggaag gtct-gggta atccgttgaa cctctttcgt
                        aaggaatcag cgtgtgccct tggccggaag gtct-gggta atccgttgaa cctctttcgt
                        aaggaatcag cgtgtgccct tggccggaag gtct-gggta atccgttgaa cctctttcgt
                        aaggaatcag cgtgttccct tggccggaag gtct-gggaa atccgttgaa cctctttcgt
                        aaggaatcag cgtgtgccct tggccggaag gtct-gggta atccgttgaa cctctttcgt
                        aaggaatcag cgtgttccct tggccggaag gtct-gggaa atccgttgaa cctctttcgt
                        aaggaatcag cgtgttccct tggccggaag gtct-gggta atccgttgaa cctctttcgt
                        GCGGAATCAG CGGGTGCCCT TGGCCGGAAG GTCT-GGGTA ATCCGCTGAA CCTCCTCCGT
                        gcggaatcag cgggtgccct tggccggaag gtct-gggta atccgctgaa cctcctccgt
                        gcggaatcag cgggtgccct tggccggaag gtct-gggta atccgctgaa cctcctccgt
                        GCGGAATCAG CGGGTGCCCT TGGCCGGAAG GTCT-GGGTA ATCCGCTGAA CCTCCTCCGT
                        gcggaatcag cgggtgccct tggccggaag gtct-gggta atccgctgaa cctcctccgt
                        gcgcaagcag cgggtgccct cggccgacag gtct-gggta atccgctgag attccgccgt
                        gcgcaagcag cgggcaccct cggccgacag gtcc-gggta acccgctgag acttctccgt
                        gaggaagcag cgggtaccct cggccgatag gtcc-gggta atccgctgag acttctccgt

                        GCTAGGGATA GGGAATTGTA ATTATTTCCC TTGAACGAGG AATTCCCAGT AGGCGCGAGT
                        GCTAGGGATA GGGAATTGTA ATTATTTCCC TTGAACGAGG AATTCCCAGT AGGCGCGAGT
                        GCTAGGGATA GGGAATTGTA ATTATTTCCC TTGAACGAGG AATTCCCAGT AAGCGCGAGT
                        gctggggata ggggattgaa attgtttccc ttgaacgagg aattcccagt aagcgcgagt
                        gctagggata gggacttgta attatttccc ttcaacgagg aatgcccagt aagcgcgagt
                        GCTAGGGATA GGGACTTGTA ATTATTTCCC TTCAACGAGG AATGCCCAGT AAGCGCGAGT
                        GCTAGGGATA GGGACTTGTA ATTATTTCCC TTCAACGAGG AATGCCCAGT AAGCGCGAGT
                        gcttgggata gggagttgca attgtctccc ttaaacgagg aattcccagt aagcgcgagt
                        gcttgggata gggagttgca attgtctccc ttaaacgagg aattcccagt aagcgcgagt
                        gattgggaca gggagttgca attgtctccc ttgaacgagg aattcccagt aagcgcgagt
                        gattgggaca gggagttgca attgtctccc ttgaacgagg aattcccagt aagcgcgagt
                        GATTGGGACA GGGAGTTGCA ATTGTCTCCC TTGAACGAGG AATTCCCAGT AAGCGCGAGT
                        gcttgggata gggagttgca attgtctccc ttaaacgagg aattcccagt aagcgcgagt
                        gcttgggata gggagttgca attgtctccc ttaaacgagg aattcccagt aagcgcgagt
                        gcttgggata gggagttgca attgtctccc ttRaacgagg aattcccagt aagcgcgagt
                        gcttgggata gggagttgca attgtctccc ttgaacgagg aattcccagt aagcgcgagt
                        gattgggata gggaattgta attatttccc ttgaacgagg aattcccagt aagcgcgagt
                        gattgggata gggaattgta attatttccc ttgaacgagg aattcccagt aagcgcgagt
                        gattgggata gggaattgta attatttccc ttgaacgagg aattcccagt aagcgcgagt
                        gattgggata gggaattgta attatttccc ttgaacgagg aattcccagt aagcgcgagt
                        gattgggata gggaattgta attatttccc ttgaacgagg aattcccagt aagcgcgagt
                        gattgggata gggaattgta attatttccc ttgaacgagg aattcccagt aagcgcgagt
                        gattgggata gggaattgta attatttccc ttgaacgagg aattcccagt aagcgcgagt
                        GATGGGGATA GGGAATTGCA ATTATTTCCC TTGAACGAGG AATTCCCAGT AAGCGCGAGT
                        gatggggata gggaattgca attatttccc ttgaacgagg aattcccagt aagcgcgagt
                        gatggggata gggagttgca attatctccc ttgaacgagg aattcccagt aagcgcgagt
                        GATGGGGATA GGGAATTGCA ATTATTTCCC TTGAACGAGG AATTCCCAGT AAGCGCGAGT
                        gatggggata gggaattgca attatttccc ttgaacgagg aattcccagt aagcgcgagt
                        gctggggaca gggacttgta attgtgtccc ttgaacgagg aattccaagt aaacgcgagt
                        gctggggaca gggacttgta attgtgtccc ttgaacgagg aattccaagt aaacgcgagt
                        gatggggaca gggacttgta attatgtccc ttgaacgagg aattccaagt aaacgcgagt

                        CAT-AGCTCG TGTCGATTAC GTCCCTGCCC TTTGTACACA CCGCCCGTCG CTACTACCGA
                        CATAAGCTCG CGTCGATTAC GTCCCTGCCC TTTGTACACA CCGGCCGTCG CTACTACCGA
                        CATAAGCTCG CGTTGATTAC GTCCCTGCCC TTTGTACACA CCGCCCGTCG CTACTACCGA
                        catcagctcg cgttgattac gtccctgtcc tttgKacaca ccgcccgtcg ctacTACCGA
                        catcagctcg cgttgattac gtccctgccc tttgtacaca ccgcccgtcg ctactaccga
                        CATCAGCTCG CGTTGATTAC GTCCCTGCCC TTTGTACACA CCGCCCGTCG CTACTACCGA
                        CATCAGCTCG CGTTGATTAC GTCCCTGCCC TTTGTACACA CCGCCCGTCG CTACTACCGA
                        catcagctcg cgttgattac gtccctgccc tttgtacaca ccgcccgtcg ctactaccga
                        catcagctcg cgttgattac gtccctgccc tttgtacaca ccgcccgtcg ctactaccga
                        catcagctcg cgttgattac gtccctgccc tttgtacaca ccgcccgtcg ctactaccga
                        catcagctcg cgttgattac gtccctgccc tttgtacaca ccgcccgtcg ctactaccga
                        CATCAGCTCG CGTTGATTAC GTCCCTGCCC TTTGTACACA CCGCCCGTCG CTACTACCGA
                        catcagctcg cgttgattac gtccctgccc tttgtacaca ccgcccgtcg ctactaccga
                        catcagctcg cgttgattac gtccctgccc tttgtacaca ccgcccgtcg ctactaccga
                        catcagctcg cgttgattac gtccctgccc tttgtacaca ccgcccgtcg ctactaccga
                        catcagctcg cgttgattac gtccctgccc tttgtacaca ccgcccgtcg ctactaccga
                        catcagctcg cgttgattac gtccctgccc tttgtacaca ccgcccgtcg ctactaccga
                        catcagctcg cgttgattac gtccctgccc tttgtacaca ccgcccgtcg ctactaccga
                        catcagctcg cgttgattac gtccctgccc tttgtacaca ccgcccgtcg ctactaccga
                        catcagctcg cgttgattac gtccctgccc tttgtacaca ccgcccgtcg ctactaccga
                        catcagctcg cgttgattac gtccctgccc tttgtacaca ccgcccgtcg ctactaccga
                        catcagctcg cgttgattac gtccctgccc tttgtacaca ccgcccgtcg ctactaccga
                        catcagctcg cgttgattac gtccctgccc tttgtacaca ccgcccgtcg ctactaccga
                        CATCAGCTCG CGTTGATTAC GTCCCTGCCC TTTGTACACA CCGCCCGTCG CTACTACCGA
                        catcagctcg cgttgattac gtccctgccc tttgtacaca ccgcccgtcg ctactaccga
                        catcagctcg cgttgattac gtccctgccc tttgtacaca ccgcccgtcg ctactaccga
                        CATCAGCTCG CGTTGATTAC GTCCCTGCCC TTTGTACACA CCGCCCGTCG CTACTACCGA
                        catcagctcg cgttgattac gtccctgccc tttgtacaca ccgcccgtcg ctactaccga
                        catcagctcg cattgattac gtccctgccc tttgtacaca ccgcccgtcg ctactaccga
                        catcagctcg cattgattac gtccctgccc tttgtacaca ccgcccgtcg ctactaccga
                        catcagctcg cattgattac gtccctgccc tttgtacaca ccgcccgtcg ctactaccga

                        TTGAACGGTT TAGTGAGATC TTCGGATCGG CCGCGGCGGG GCCGAGAAGA CGATCGAACT
                        TTGAACGGTT TAGTGAGATC TTCGGATCGG CGGCGGCGGG GCCGAGAAGA CGATCGAACT
                        TTGAATGGTT TAGTGAGATC TTCGGATCGG CCACGTCGGG GCCGAGAAGA TGATAAAACT
                        TCGAACGGTT TAGTGAGGTY TTCGGATYGG CCGTGTCGGG CCCGAAAA-- ----------
                        ttgaatggtt tagtgagatc atcggatcgg ccgtgtcggt tccgaaaaga cgctcaaact
                        TTGAATGGTT TAGTGAGATC ATCGGATCGG CCGTGT---- ---------- ----------
                        TTGAATAGTT TAGTGAGATC ATCGGATCGG CCGTGTCGGG TCCGAGAAGA CGCTCAAACT
                        ttgaatggtt tagTgagatc ctcggacggg ccgcggcggg gcccggaaga ccatcgaact
                        ttgaatggtt tagtgagatc ctcggacggg ccgcggcggg gcccggaaga cgaYcgaact
                        ttgaatggtt tagtgagatc ctcggacggg ccgcggcggg gcccggaaga cgatcgaact
                        tcgaatggtt tagtgagata ctcggaccgg ccgcgggggg gcccgaaaga agatcgaact
                        TCGAATGGTT TAGTGAGATA CTCGGACCGG CCGCGGCGGG GCCCGAAAGA AGATCGAACT
                        ttgaatggtt tagtgagatc ctcggacggg ccgcggcggg gcccggaaga cgatcgaact
                        ttgaatggtt tagtgagatc ctcggacggg ccgcggcggg gcccggaaga cgatcgaact
                        ttgaatggtt tagtgagatc ctcggacggg ccgcggcggg gcccggaaga cgatcgaact
                        ttgaatggtt tagtgagatc atcggacggg ccgcggcggg gcccggaaga cgatcgaact
                        ttgaatggtt tagtgagatc ctcggatcgg ccgggtcggg cccgagaaga cgatcaaact
                        ttgaatggtt tagtgagatc ctcggatcgg ccgggtcggg cccgagaaga cgatcaaact
                        ttgaatggtt tagtgagatc cttggatcgg ccgggtcggg cgcgagaaga cgatcaaact
                        ttgaatggtt tagtgagatc ctcggattgg ccgggtcg-- -ccgagaaga cgatcaaact
                        ttgaatggtt tagtgagatc ctcggatcgg ccgggtcggg cccgagaaga cgatcaaact
                        ttgaatggtt tagtgagatc ctcggattgg ccgggtcgga cctgaaaaga cgatcaaact
                        ttgaatggtt tagtgagatc ctcggatcgg ccgggtcggg cccgagaaga cgatcaaact
                        TTGAATGGTT TAGTGAGATC CTCGGATCGT CCGCGTCGGG TACGAGAAGA CGATCAAACT
                        ttgaatggtt tagtgagatc ctcggatcgt cggcgtcggg Aacgagaaga cgatcaaact
                        ttgaatggtt tagtgagatc ctcggatcgt cggcgtcggg aacgagaaga cgatcaaact
                        TTGAATGGTT TAGTGAGATC CTCGGATCGT CCGCGTCGGG TACGAGAAGA CGATCAAACT
                        ttgaatggtt tagtgagatc ctcggatcgt cggcgtcggg aacgagaaga cgatcaaact
                        tcgaatggct tagtgaggcc attggatcgt ccgtctcgRc aacgagaaga cggtcaaact
                        tcgaatggct tagtgaggcc atcggatcga ccgtcc-ggc aacgagaaga cggtcaaact
                        tcgaatggct tagtgaggcc atcggatcgt ccgtct-ggc aacgaaaaga cggtcaaact

                        TTATCACWAA GCGGAGGAAA AGAAACTAAC CAGGATTCCC TCAGTAACGG CGAGTGAAGC
                        TTATCACTAA GCGGAGGAAA AGAAACTAAC CAGGATTCCC CTAGTAACGG CGAGTGAAGC
                        TTATTACTAA GCGGAGGAAA AGAAACTAAC AAGGATTCCC TCAGTAACGG CGAGTGAAGC
                        -tattactaa gcggaggaaa agaaaccaac agggattccc ccagtaacgg cgagtgaaca
                        ttattactaa gcggaggaaa agaaactaac aaggattccc tcagtagcgg cgagtgaagc
                        ---------- ---------- ---------- --GGATTCCC TCAGTAGCGG CGAGTGAAGC
                        T--------- ---------- ---------- ---------- ---------- ----------
                        ttatcactaa gcggaggaaa agaaactaac aaggattccc ctagtagcgg cgagcgaagc
                        t--------- ---------- ---------- ---------- ---------- ----------
                        ttatcactaa gcggaggaaa agaaactaac caggattccc ccagtagcgg cgagcgaagc
                        t--------- ---------- ---------- ---------- ---------- ----------
                        T--------- ---------- ---------- ---------- ---------- ----------
                        ttatcactaa gcggaggaaa agaaactaac aaggattccc tcagtagcgg cgagcgaagc
                        t--------- ---------- ---------- ---------- ---------- ----------
                        ttatcactaa gcggaggaaa agaaactaac caggattccc ccagtagcgg cgagcgaagc
                        t--------- ---------- ---------- ---------- ---------- ----------
                        t--------- ---------- ---------- ---------- ---------- ----------
                        t--------- ---------- ---------- ---------- ---------- ----------
                        t---tactaa gcggaggaaa agaaactaac caggattccc tcagtagcgg cgagtgaagc
                        ttattactaa gcggaggaaa agaaactaac ctggattccc tcagtagcgg cgagtgaagc
                        t--------- ---------- ---------- ---------- ---------- ----------
                        t--------- ---------- ---------- ---------- ---------- ----------
                        t--------- ---------- ---------- -----ttccc tcagtagcgg cgagtgaagc
                        T---CACTAA GCGGAGGAAA AGAAACTAAC GAGGATTCCC TCAGTAGCGG CGAGTGAAGC
                        ttatcactaa gcggaggaaa agaaactaac caggattccc t-agtagcgg cgagtgaagc
                        ttatcactaa gcggaggaaa agaaactaac caggattccc tcagtagcgg cgagtgaagc
                        TTATCACTAA GCGGAGGAAA AGAAACTAAC GAGGATTCCC TCAGTAGCGG CGAGTGAAGC
                        t---cactaa gcggaggaaa agaaactaac caggattccc tcagtagcgg cgagtgaagc
                        ttattactaa gcggaggaaa agaaactaac aaggattcca tcagtagcgg cgagcgaaga
                        ttatcactaa gcggaggaaa agaaactaac aaggattccc ctagtagcgg cgagcgaagg
                        ttatcactaa gcggaggaaa agaaactaac aaggattccc tcagtagcgg cgagtgaagg

                        GGGAAGAGCC CAGCGCCGAA TCCCCGGGAA CTGTGGCGTA AGGAGGTGCC GGTCGGCGCG
                        GGGAAGAGCC CAGCGCCGAA TCCCCGGGAA ATGTGGCGTA AGGAAGTGCC GGTCGGCGCG
                        GGGAACAGCC CAGCGCCGAA TCCCAGGGAA CTGTGGCGTA AGGAAGCACC CTTCGGCGCG
                        gggaaaagcc cagcgccgaa tccccgggaa ctgtggcgtg aggaagaaag cgttcgcggg
                        gggatcagcc cagcgccgaa tccccgggaa atgtggcgta aggaagcccc actccgcacg
                        GGGATCAGCC CAGCGCCGAA TCCCCGGGAA ATGTGGCGTA AGAAAGCCCC ACTCCGCACG
                        ---------- ---------- ---------- ---------- ---------- ----------
                        gggaagagcc catcgccgaa tcccagggaa ctgtggcgta aggaagtcca atcccgcggc
                        ---------- ---------- ---------- ---------- ---------- ----------
                        gggaagagcc cagcgccgaa tccccgggaa ctgtggcgta aggaagtccg gccccgcggc
                        ---------- ---------- ---------- ---------- ---------- ----------
                        ---------- ---------- ---------- ---------- ---------- ----------
                        gggaagagcc catcgccgaa tccca?ggaa atgtggcgta aggaagtccg --ttcgcgtc
                        ---------- ---------- ---------- ---------- ---------- ----------
                        gggaagagcc cagcgccgaa tcccagggaa ctgtggcgta aggaagtccg ag-ccgcggc
                        ---------- ---------- ---------- ---------- ---------- ----------
                        ---------- ---------- ----tgggaa atgtggcgta aggaagccgt ggctaaccgg
                        ---------- ---------- -ccctgggaa atgtggcgta aggaagccgt ggctaaccgg
                        gggaagagcc catcgccgaa tccccgggaa atgtggcgta aggaagccgt ggctaaccgg
                        gggaagagcc catcgccgaa tctccgagaa atgtggcgtg aggaagccgt ggctaaccgg
                        ---------- ---------- ---------- ---------- ---------- ----------
                        ---------- ---------- ---------- ---------- ---------- ----------
                        gggaaaagcc catcgccgaa tccctgggaa atgtggcgta aggaagccgt ggctaaccgg
                        GGGAAGAGCC CATCGCTGAA TCCCGGGGAG TTGTGGCGTG AGGCGGCTTC GGGCGCGCGA
                        gg-ataagcc catcgccgaa tccc-gggac ctgtggcgtg aggcggcttc gggcatgcga
                        gggaagagcc catcgccgaa tccctgggac ctgtggcgtg aggcggcttc gggcgcgcga
                        GGGAAGAGCC CATCGCTGAA TCCCGGGGAG TTGTGGCGTG AGGCGGCTTC GGGCGCGCGA
                        gggaagagcc catcgccgaa tccctgggac ctgtggcgtg aggcggcttc gggcgcgcga
                        tggagaagcc cagcgccgaa tccgagggac ctgtggcgta cgggaaccga agtcttgccg
                        gggaaaagcc cagcgctgaa tcccagggaa ctgtagcgta aggaaactga attccgtgcg
                        gggaagagcc cagcgctgaa tcccagggaa ttgtggcgta aggaaactga attccggccg

                        TGCCCACGTC CTTCTGATCG AGGCGCCCAG AGTGGGTGTC AGGCCCGGCC TCCGGGAGTC
                        CGCCCGCGTC CTTCTGATCG AGGCGCCCGG AGCGGGTGTC AGGCCCGGCT TCCGGGAGTC
                        CGCCTACGTC CTTCTGATCG AGGCGCCCGG TGAGGGTGTC AGGCCCGGCT TCCAGGAGTC
                        cgtctacgtc cttctgatcg aggctcccgt ggtgggtgtc aggcccgtct tccaggagtc
                        tgctcacgtc cttctgatcg aggctcccat agagggtgtc aggcccggtt ttcaggagtc
                        TGCTCACGTC CTTCTGATCG AGGCTCCCAC AGAGGGTGTC AGGCCCGGTT TTCAGGAGTC
                        ---------- ---------- ----TCCCAT AGAGGGTGTC AGGCCCGGCT TTCAGGAGTC
                        cgccgaggtc cttctgattg aggctcccag ggcgggtgtc aggcccggcc tccgggagtc
                        ---------- ---------- ---------- ---------- ---------- ----------
                        cgccgaggtc ctcctgatcg aggctcccag ggcgggtgtc aggcccggct tccgggagtc
                        ---------- ---------- ---------- ---------- ---------- ----------
                        ---------- ---------- ---------- ---------- ---------- ----------
                        cgccgaggtc cttctgatcg aggctcccac ggcgggtgtc aggcc-ggct tccaggagtc
                        ---------- ---------- ---------- ---------- ---------- ----------
                        cgccgaggtc cttctgatcg aggctcccat ggcgggtgtc aggcc-ggct tccgggagtc
                        ---------- ---------- ---------- ---------- ---------- ----------
                        agccgacgtc cttgtgaagg aggctcccat agagtgtgtt aggcccggct ttcaagagtc
                        ggccgacgtc cttgtgaagg aggctcccat agagtgtgtt aggcccggct ttcaagagtc
                        ggccgacgtc cttgtgaagg aggctcccat agagtgtgtt aggcccggct ttcaagagtc
                        agccgacgtc cttgtgaagg aggctcccat agagtgtgtt aggcccggct tctaagagtc
                        ---------- ---------- ---------- ---------- ---------- ----------
                        ---------- ---------- ---------- ---------- ---------- ----------
                        ggccgacgtc cttgtgaagg aggctcccat agagtgtgtt aggcccggct ttcaagagtc
                        GGCCGAGGTC CTCCTGATCG GGGCACCCAG AGCGGGTGTC AGGCCCAGCC ACCACGAGTC
                        ggccgaggtc ctcctgatcg gggcacccag agcgggtgtc aggcccagcc accaagagtc
                        ggccgaggtc ctcctgatcg gggcacccag agcgggtgtc aggcccagcc accaagagtc
                        GGCCGAGGTC CTCCTGATCG GGGCACCCAG AGCGGGTGTC AGGCCCAGCC ACCAAGAGTC
                        ggccgaggtc ctcctgatcg gggcacccag agcgggtgtc aggcccagcc accaagagtc
                        actcaagttc ctgctgatcg gggcagccag agtgggtgat agtcccgttY tccaagagtc
                        ttcggctgtc ctcctgagtg gggctcc-gt agcggg?gta aggcccgctt tccaagagtc
                        ggcggcagtc ctcttaagtg gggctcccat agcgggtgta aggcccgctt tccaagagtc

                        GGGTTGTTTG GGAATGCAGC CCAAAGGTCG GTGGCAAACT CCATCGAAGG CTAAATACTG
                        GGGTTGTTTG GGAATGCAGC CCAAAGGTCG GTGGCAAGCT CCATCGAAGG CTAAATACTG
                        GGGTTGTTTG AGAATGCAGC CCCAAGACCG GTGGTAAACT CCATCGAAGG CTAAATACTG
                        gggtagtttg ggaatgctgc ccaaagaccg gtggtagacc ccatcgaagg ctaaacacgg
                        gggttgtttt ggaatgcagc ccaaagacgg gtggtaaact ccatccaagg ctaaatactg
                        GGGTTGTTTT GGAATGCAGC CCAAAGACGG GTGGTAAACT CCATCCAAGG CTAAATACTG
                        GGGTTGTTTT GGAATGCAGC CCAAAGACGG GTGGTAAACT CCATCCAAGG CTAAATACTG
                        gggttgtttt gtagcgcagc ccaaagaagg gtggtaaact ccatccaagg ctaaatacct
                        ---------- ---------- ---------- ---------- ---------- ----------
                        gggttgtttt gtagtgcagc ccaaaggcgg gtggtaaact ccatccaagg ctaaat?ccg
                        ---------- ---------- ---------- ---------- ---------- ----------
                        ---------- ---------- ---------- ---------- ---------- ----------
                        gggttgttct gtagcgcagc ccaaaggcgg gt?gtaaact ccatccaagg c??aatacc-
                        ---------- ---------- ---------- ---------- ---------- ----------
                        gggttgtttt gtagcgcagc ccaaaggcgg gtggtaaact ccatccaagg ctaaatacct
                        ---------- ---------- ---------- ---------- ---------- ----------
                        gggttgtttt ggaatgcagc ccaaagacgg gtggtaaact ccatccaagg ctaaatactg
                        gggttgtttt ggaatgcagc ccaaagacgg gtggtaaact ccatccaagg ctaaatactg
                        gggttgtttt ggaatgcagc ccaaagacgg gtggtaaact ccatccaagg ctaaatactg
                        gggttgtttg agaatgcagc cctaagacag gtggtaaact ccatctaagg ctaaatactg
                        ---------- ---------- ---------- ---------- ---------- ----------
                        ---------- ---------- ---------- ---------- ---------- ----------
                        gggttgtttt ggaatgcagc ccaaagacgg gtggtaaact ccatccaagg ctaaatactg
                        GGGTTGTTTT GGAATGCAGC CCAAAGAGGG GTGGTGAACT CCATCCAAGG CTAAATACTG
                        aggtagtttt ggaatgctgc ctaaagaggg gtggtgaact ccatccaagg ctaaatactg
                        gggtagtttt ggaatgctgc ccaaagaagg gaggtgaact ccttccaagg ctaaatactg
                        GGGTTGTTTT GGAATGCAGC CCAAAGAGGG GTGGTGAACT CCATCCAAGG CTAAATACTG
                        gggtagtttt ggaatgctgc ccaaagaagg gtggtgaact ccatccaagg ctaaatactg
                        gggttgtttg agattgcagc cctaagacgg gtggtgaatt ccatccaagg ctaaatacta
                        gggttgtttt ggaatgcagc c??aagacgg g??gtgaatt ccatccaagg ctaaatatta
                        gggttgtttt ggaatgcagc ccaaagaggg gtggtgaact ccatccaagg ctcaatacta

                        GCACGAGACC GATAGCGAAC AAGTACCGCG AGGGAAAGTA GCCCATGAAA GGCGTTGGTT
                        GCACGAGACC GATAGCGAAC AAGTACCGTG AGGGAAAGTA GCCCATGAAA GGCGTTGGTT
                        GCACGAGACC GATAGCGAAC AAGTACCGCG AGGGAAAGTA CCCCATGAAA GGCGTTGGTT
                        gcacgagacc gatagcgaac aagtMccgtg agggaaagta taccacgaaa ggtgttggtc
                        gcacgagtcc gatagcgaac aagtaccgtg agggaaagta tcccataaaa ggtgttggtt
                        GCACGAGTCC GATAGCGAAC AAGTACCGTG AGGGAAAGTA TCCCAGAAAA GGTGTTGGTT
                        GCACGAGTCC GATAGCGAAC AAGTACCGTG AGGGAAAGTA TCCCAGAAAA GGTGTTGGTT
                        gcacgagacc gatagagcac aagtaccgtg agggaaagta gcccagaaaa ggcgttggtt
                        ---------- ---------- ---------- ---------a gcccagaaaa ggcgttggtt
                        gcacgagacc gatagagcac aa-------- ---------- ---------- ----------
                        ---------- ---------- ---------- ---------a gcccagaaaa ggcgttggtc
                        ---------- ---AGCGAAC AAGTACCGTG AGGGAAAGT- ---------- ----------
                        ggccgagacc gatagagcac aagtaccgtg agggaaagta gcccataaaa ggggttggtc
                        ---------- ---------- ---------- ---------- ---------- ----------
                        gcacgagacc gatagagcac aagtaccgtg agggaaagt- ---------- ----------
                        ---------- ---------- ---------- ---------a gcccagaaaa ggcgttggtt
                        gcacgagacc gatagatgac aagtaccatg agggaaagta ccccataaaa ggtgttggtc
                        gcacgagacc gataggtgac aagtaccatg agggaaagta ccccagaaaa ggtgttggtt
                        gcacgagacc gatagatgac aagtaccatg agggaaagta ccccagaaaa ggtgttggtt
                        gcacgagacc gatagttcac aagtaccatg agggaaagta ccccagaaaa ggtgttggtt
                        ---------- ---------- ---------- ---------a ccccacaaaa ggtgttggtt
                        ---------- ---------- ---------- ---------a ccccagaaaa ggtgttggtt
                        gcacgagacc gatagatgac aagtaccatg agggaaagt- ---------- ----------
                        GCACGAGACC GATAGCAGAC AAGTACCGTG AGGGAAAGT- ---------- ----------
                        gcacgagacc gatagcagac aagtaccgtg agggaaagta tcccagaaaa ggtgttggtc
                        gcacgagacc gatagcagac aagtaccgtg agggaaagta tcccagaaaa ggtgttggtc
                        GCACGAGACC GATAGCAGAC AAGTACCGTG AGGGAAAGT- ---------- ----------
                        gcacgagacc gatagcagac aagtaccgtg agggaaagt- ---------- ----------
                        gcacgagacc gatagttgac aagtaccgtg agggaacgta gcccacaaaa ggcgttggtt
                        gcacgagacc gatagacgac aagtaccgtg aggga----- ---------- ----------
                        tgccgagacc gatagtcgac aagtaccgtg agggaacgt- ---------- ----------

                        GATACAGACA GCAGGACGGT GGCCACGGAA GTCGGAATCC GCTAAGGAGT GTGTAACAAC
                        GATACAGACA GCAGGACGGT GGCCATGGAA GTCGGAATCC GCTAAGGAGT GTGTAACAAC
                        GATACAGACA GCAGGACGGT GGCCATGGAA GTCGGAATCC GCTAAGGAGT GTGTAACAAC
                        gatagagaca gcaggacggt ggccacggaa gttggaaccc gccaaggagt gtgtaacaac
                        gatacagaca gcaggacggt ggccatggaa gtcggaatcc gctaaggagt gtgtaacaac
                        GATACAGACA GCAGGACGGT GGCCATGGAA GTCGGAATCC GCTAAGGAGT GTGTAACAAC
                        GATACAGACA GCAGGACGGT GGCCATGGAA GTCGGAATCC GCTAAGGAGT GTGTAACAAC
                        gatacagaca gcaggacggt ggccatggaa gtcggaatcc gctaaggagt gtgtaacaac
                        gatacagaca gcaggacggt ggccatggaa gtcggaatcc gctaaggagt gtgtaacaac
                        ---------- ---------- ---------- ---------- ---------- ----------
                        gatacagaca gcaggacggt gaccatggaa gtcgggatcc gccaaggagt gtgtaacaac
                        ---------- ---------- ---------- ---------- ---------- ----------
                        gatacagaca gcaggacggt ggccatggaa gtcggaatcc gccaaggagt gtgtaacaac
                        ---------- ---------- ---------- ---------- ---------- ----------
                        ---------- ---------- ---------- ---------- ---------- ----------
                        gatacagaca gcaggacggt ggccatggaa gtcggaatcc gccaaggagt gtgtaacaac
                        gatatagaca gcaggacggt ggccatggaa gtcggaatcc gctaaggagt gtgtaacaac
                        gatatagaca gcaggacggt ggccatggaa gtcggaatcc gctaaggagt gtgtaacaac
                        gatatagaca gcaggacggt ggccatggaa gtcggaatcc gctaaggagt gtgtaacaac
                        gatatagaca gcaggacggt ggccatggaa gttggaatcc gctaaggagt gtgtaacaac
                        gatatagaca gcaggacggt ggccatggaa gtcggaatcc gctaaggagt gtgtaacaac
                        gatatagaca gcaggacggt ggccatggaa gttggaatcc gctaaggagt gtgtaacaac
                        ---------- ---------- ---------- ---------- ---------- ----------
                        ---------- ---------- ---------- ---------- ---------- ----------
                        gatatagaca gcaggacggt ggccatggaa gtcggaatcc gctaaggagt gtgtaacaac
                        gatacagaca gcaggacggt ggccatggaa gtcggaaccc gctaaggagt gtgtaacaac
                        ---------- ---------- ---------- ---------- ---------- ----------
                        ---------- ---------- ---------- ---------- ---------- ----------
                        gatacagaca gcaggacggt ggccatggaa gtcggcatcc gccaaggagt gtgtaacaac
                        ---------- ---------- ---------- ---------- ---------- ----------
                        ---------- ---------- ---------- ---------- ---------- ----------

                        TCACCTGCCG AATCAACTAG CCCTGAAAAT GGATGGCGCT GGAGCGTCCG AGCCCATACC
                        TCACCTGCCG AATCAACTAG CCCTGAAAAT GGATGGCGCT GGAGCGTCCG AGCCCATACC
                        TCACCTGCCG AATCAACTAG CCCTGAAAAT GGATGGCGCT GGAGCGTCCG AGCCCATACC
                        tcacctgccg aatcgagcag ccctgaaaat ggatggcgct ggagcggggg g-cccaRacc
                        tcacctgccg aatcaactag ccctgaaaat ggatggcgct -gagcgtgcc g-cctatacc
                        TCACCTGCCG AATCAACTAG CCCTGAAAAT GGATGGCGCT -GAGCGTGCC G-CCTATACC
                        TCACCTGCCG AATCAACTAG CCCTGAAAAT GGATGGCGCT -GAGCGTGCC G-CCTATACC
                        tcacctgccg aatcaactag ccctgaaaat ggatggcgct -gagcgtgcc g-cccatacc
                        tcacctgccg aatcaactag ccctgaaaat ggatggcgct -gagcgtgcc g-cccatacc
                        ---------- ---------- ---------- ---------- ---------- ----------
                        tcacctgccg aatcgactag ccctgaaaat ggatggcgct -gagcgtgcc g-cccatacc
                        ---------- ---------- ---------- ---------- ----?----- ----------
                        tcacctgccg aatcgactag ccctgaaaat ggatggcgct -gagcgtgcc g-cccatacc
                        ---------- ---------- ---------- ---------- ---------- ----------
                        ---------- ---------- ---------- ---------- ---------- ----------
                        tcacctgccg aatcaactag ccctgaaaat ggatggcgct -gagcgtgcc g-cccatacc
                        tcacctgccg aatcaactag ccctgaaaat ggatggcgct -gagcgtgac g-ctcatacc
                        tcacctgccg aatcaactag ccctgaaaat ggatggcgct -gagcgtgac g-ctcatacc
                        tcacctgccg aatcaactag ccctgaaaat ggatggcgct -gagcgtgac g-ctcatacc
                        tcacctgccg aatcaactag ccctgaaaat ggattgcgct -gagcgtgac g-cttatacc
                        tcacctgccg aatcaactag ccctgaaaat ggatggcgct -gagcgtgac g-ctcatacc
                        tcacctgccg aatcaatcag ccctgaaaat ggattgcgct -gagcgtgac g-cttatacc
                        ---------- ---------- ---------- ---------- ---------- ----------
                        ---------- ---------- ---------- ---------- ---------- ----------
                        tcacctgccg aatcaaccag ccctgaaaat ggatggcgct -gagcgtgtg g-cccatacc
                        tcacctgccg aatcgaccag ccctgaaaat ggatggcgct -gagcgtgtg g-cccatacc
                        ---------- ---------- ---------- ---------- ---------- ----------
                        ---------- ---------- ---------- ---------- ---------- ----------
                        tcacctgccg aatcaactag ccctgaaaat ggatggcgct -gagcgtgtc g-gctgtgcc
                        ---------- ---------- ---------- ---------- ---------- ----------
                        ---------- ---------- ---------- ---------- ---------- ----------

                        CGGCCGCCGC GGCACATTAG GCCGCGGCGT GTAGGAGGGT CGCTGCGGCG AGCGCTGAAG
                        CGGCCGCCGC GGCAAGCTAG GCCGCGGCGT GTAGGAGGGT CGCTGCGGCG AGCGCAGAAG
                        CGGCCGCCGC GGCAGGCTAG GCCGCGGCGA GTAGGAGGGT CGCTGCGGTG AGCGCAGAAG
                        cggccgtcgc ggcgggttac gccgcgacRa gtaggaggg- cgcggcggtg -gcgcggaag
                        cggccgtcgg ggcagataag ccccg-acga gtaggagggt cgctgcggtg agcgttgaag
                        CGGCCGTCGG GGCAGATAAG CCCCG-ACGA GTAGGAGGGT CGCTGCGGTG AGCGTTGAAG
                        CGGCCGTCGG GGCAGATAAG CCCCG-ACGA GTAGGAGGGT CGCTGCGGTG AGCGTTGAAG
                        cggccgtcgg ggcagatacg ccccg-acga gtaggagggc cgccgcggtg tgcgtcgaag
                        cggccgtcgg ggcagatacg ccccg-acga gtaggagggc cgccgcggtg tgcgtcgaag
                        ---------- ---------- ---------- ---------- ---------- ----------
                        cggccgccgg ggcaaatatg ccccg-gcga gtaggagggc cgccgcggtg ggcgtcgaag
                        ---------- ---------- ---------- ---------- ---------- ----------
                        cggccgtcgg ggcagatagg ccc-g-acga gtag-agg-c c?ccgcggtg cgcgtt-aag
                        ---------- ---------- ---------- ---------- ---------- ----------
                        ---------- ---------- ---------- ---------- ---------- ----------
                        cggccgtcgg ggcagatacg ccccg-acga gtaggagggc cgccgcggtg cgcgtcgaag
                        cggccgtcgg ggcagttacg ccccg-acga gtaggaggga cgccgtggtg agcaacgaag
                        gggccgtcgg ggcagttacg ccccg-acga gtaggaggga cgccgtggtg agcaacgaag
                        gggccgtcgg ggcagttacg ccccg-acga gtaggaggga cgcagtggtg agcaacgaag
                        cggccgtcga ggcagttacg cctcg-acga gtaggaggga cgccgtggtg agcaacgaag
                        gggccgtcgg ggcagttacg ccccggacga gtaggaggga cgccgtggtg agcaacgaag
                        aggccgtcgg ggtagttaca ccccgcacga gtaggaggga cgccgtggtg agcaacgaag
                        ---------- ---------- ---------- ---------- ---------- ----------
                        ---------- ---------- ---------- ---------- ---------- ----------
                        cggccgctgg ggcagataag cccca-gcga gtaggaggga cgccgcggtg agcgcggaag
                        cggccgctgg agcagataag cccca-gcga gtaggaggga cgccgcggtg agcgcggaag
                        ---------- ---------- ---------- ---------- ---------- ----------
                        ---------- ---------- ---------- ---------- ---------- ----------
                        gggccgtcgg ggc-gaatgt ccccg-atga gtaggaagga caccgcggtg ggctacgaag
                        ---------- ---------- ---------- ---------- ---------- ----------
                        ---------- ---------- ---------- ---------- ---------- ----------

                        CGCCGGGCGC GAGCCCGCGT GGAGCCGCCG CAGGTGCAGA TCTTGGTGGT AGTAGCAAAT
                        CGTCCGGGCG CGAGCCGCGT GGAGCCGCCG CAGGTGCAGA TCTTGGTGGT AGTAGCAAAT
                        CGCCGGGCGC GAGCCCGCGT GGAGCCGCCG CAGGTGCAGA TCTTGGTGGT AGTAGCAAAT
                        ggccggccgc gaggccgccc ggagccaccg ctggtgcaga tcttggtggt agtagcagat
                        cgtagggcgc gagcccgcgt ggagccgccg tgggtgcaga tcttggtggt agtagcaaat
                        CGTAGGGCGC GAGCCCGCGT GGAGCCGCCG TGGGTGCAGA TCTTGGTGGT AGTAGCAAAT
                        CGTAGGGCGC GAGCCCGCGT GGAGCCGCCG TGGGTGCAGA TCTTGGTGGT AGTAGCAAAT
                        cgcgggccgt gaggccgcgt ggagccgccg cgggcgcaga tcttggtggt agtagcaaat
                        cgccggccgc gaggccgcgt ggagccgccg cgggcgcaga tcttggtggg agtagcaaat
                        ---------- ---------- ---------- ---------- ---------- ----------
                        cgcaggccgt gaggccgcgt ggagccgctg cgggcgcaga tcttggtggt agtagcaaat
                        -------?-- ---------- ---------- ---------- ---------- ----------
                        cgccggccgc tgagccgcgt gga-ccgccg cgggcgcaga tcttggtggt agtagcaaat
                        ---------- ---------- ---------- ---------- ---------- ----------
                        ---------- ---------- ---------- ---------- ---------- ----------
                        cgccggccgc gaggccgcgt ggagccgccg cgggcgcaga tcttggtggt agtagcaaat
                        cgacggccga gaggccgcgc ggagccgcct cgggcgcaga tcttggtggt agtagcaaat
                        cgacggccga gaggccgcgc ggagccgcca cgggcgcaga tcttggtggt agtagcaaat
                        cgacggccga gaggccgcgc ggagccgcca ctggcgcaga tcttggtggt agtagcaaat
                        cgacggccga gaggccgcgc ggagccgcca cgggtgcaga tcttggtggt agtagcaaat
                        cgacgatcgt gagatcgcgc ggagccgcca cgggtgcaga tcttggtggt agtagcaaat
                        cgatggccgc gaggccacgc ggagccgcca cgggcgcaga tcttggtggt agtagcaaat
                        ---------- ---------- ---------- ---------- ---------- ----------
                        ---------- ---------- ---------- ---------- ---------- ----------
                        ctacgggcgc gagcccgcgt ggagccgccg cgggcgcaga tcttggtggt agtagcaaat
                        cgacgggcgc gagcccgcgt ggagccgccg cgggcgcaga tcttggtggt agtagcaaat
                        ---------- ---------- ---------- ---------- ---------- ----------
                        ---------- ---------- ---------- ---------- ---------- ----------
                        cgcttcgggg gagaccgcgt ggagcctccg cggacgcaga tcttggtggt agtagcaaat
                        ---------- ---------- ---------- ---------- ---------- ----------
                        ---------- ---------- ---------- ---------- ---------- ----------

                        ATTCAAGCGA GAACCTTGAA GGCCGAA-GT GGAGAAGGGT TCCATGTGAA CAGCAGTTGA
                        ATTCAAGTGA GAACCTTGAA GGCCGAA-GT GGAGAAGGGT TCCATGTGAA CAGCAGTTGA
                        ATTCAAGTGA GAACCTTGAA GGCCGAA-GT GGAGAAGGGT TCCATGTGAA CAGCAGTTGA
                        attcgagcga gaccctcgaa ggccgaa-gt ggagaagggt tccatgtgaa cagcagttga
                        attcaagtga gagccttgag ggccgagtgt ggagaagggt tccatgtgaa cagccgttgc
                        ATTCAAGTGA GAGCCTTGAG GGCCGAGTGT GGAGAAGGGT TCCATGTGAA CAGCCGTTGC
                        ATTCAAGTGA GAGCCTTGAG GGCCGAGTGT GGAGAAGGGT TCCATGTGAA CAGCCGTTGC
                        attcgagtga gatcctcgag gaccgagtgc ggagaagggt tccatgtgaa cagcagttgt
                        attcgagtga gatcctcgag gaccgagtgc ggagaagggt tccatgtgaa cagcagttgt
                        ---------- ---------- ---------- ---------- ---------- ----------
                        attcgagtga gatcctcgag gaccgagtgc ggagaagggt tccatgtgaa cagcagttgt
                        ---------- ---------- ---------- ---------- ---------- ----------
                        attcgagtga gatcctcgag gaccgagtgc ggagaagggt tccatgtgaa cagcagttgt
                        ---------- ---------- ---------- ---------- ---------- ----------
                        ---------- ---------- ---------- ---------- ---------- ----------
                        attcgagtga gatcctcgag ggccgagtgc ggagaagggt tccatgtgaa cagcagttgt
                        actcaagtga gagccttgag ggccgagtgt ggagaagggt tccatgtgaa cagccgttgc
                        actcaagtga gagccttgag ggccgagtgt ggagaagggt tccatgtgaa cagccgttgc
                        actcaagtga gagccttgag ggccgagtgt ggagaagggt tccatgtgaa cagccgttgc
                        actcagatga gtaccttgag gccggagtgt ggcagagggt tccatgtgaa cagccgttgc
                        actcaagtga gagccttgag ggccgagtgt ggagaagggt tccatgtgaa cagccgttgc
                        actcaagtga gagccttgag ggccgagtgt ggagaagggt tccatgtgaa cagctgttgc
                        ---------- ---------- ---------- ---------- ---------- ----------
                        ---------- ---------- ---------- ---------- ---------- ----------
                        actcaagcga gatccttgag ggccgagtgt ggagaagggt tccatgtgaa cagccgttgc
                        actcaagcga gatccttgag ggccgagtgt ggagaagggt tccatgtgaa cagccgttgc
                        ---------- ---------- ---------- ---------- ---------- ----------
                        ---------- ---------- ---------- ---------- ---------- ----------
                        attcaaacga gaRccttgaa gatcgagcgt ggagaagggt tccatgtgaa cagcagttgc
                        ---------- ---------- ---------- ---------- ---------- ----------
                        ---------- ---------- ---------- ---------- ---------- ----------

                        ACATGGGTCA GTCGATCCTA AGAGACAGGA GAGTTCCGTT TGGACGCCTC CTCGAAAGGG
                        ACATGGGTCA GTCGATCCTT AGAGACAGGA GAGTTCCGTT TGGACGCC-C CTCGAAAGGG
                        ACATGGGTCA GTCGACCCTG AGAGATAGGA GAGTTCCGTT CCGACGCATC CTCGAAAGGG
                        acatgggtca gccggtcctg agccgcggga cagYtcttct gcgaatgtcg agcgaaaggg
                        acatgggtca gtcgatccta agctataggg tagttccgtt ccgagcggta tgcgaaaggg
                        ACATGGGTCA GTCGATCCTA AGCTATAGGG TAGTTCCGTT CCGAGCGGTA TGCGAAAGGG
                        ACATGGGTCA GTCGATCCTA AGCTATAGGG TAGTTCCGTT CCGAGCGGTA GGCGAAAGGG
                        acatgggtca gtcgatccta agccccaggg aagttccgct ccgagcggcg ggcgaaaggg
                        acatgggtca gtcgatccta agccccaggg aagttccgct ccgagcggcg ggcgaaaggg
                        ---------- ---------- ---------- ---------- ---------- ----------
                        acatgggtca gtcgatccta agccccaggg aagttccgct ccgagcggcg ggcgaaaggg
                        --------?- ---------- ---------- ---------- ---------- ----------
                        acatgggtca gtcgatccta agccccaggg aaactccgct ccgagcggcg ggcgaaaggg
                        ---------- ---------- ---------- ---------- ---------- ----------
                        ---------- ---------- ---------- ---------- ---------- ----------
                        acatgggtca gtcgatccta agccccaggg aagttccgct ccgagcgg-- ----------
                        acatgggtca gtcgatccta aggtctaggg tagttccgct ctgagcggtg gccgaaaggg
                        acatgggtca gtcgatccta aggcctaggg tagttccgct ctgagcggtg gccgaaaggg
                        acatgggtca gtcgatccta aggcctaggg tagttccgct ctgagcggtg gccgaaaggg
                        acatgggtca gtcgatccta aggcctaggg tagttccgct ctgagcggtg gccgaaaggg
                        acatgggtca gtcgatccta aggcctaggg aagttccgct ctgagcggtg gtcgaaaggg
                        acatgggtca gtcgatccta agttctaggg aagttccgct ctgagcggtg gacgaaaggg
                        ---------- ---------- ---------- ---------- ---------- ----------
                        ---------- ---------- ---------- ---------- ---------- ----------
                        acatgggtca gtcgatccta agccctaggg tagttccgct ccgagcggtg ggcgaaaggg
                        acatgggtca gtcgatccta agccctaggg tagttccgct ccgagcggtg ggcgaaaggg
                        ---------- ---------- ---------- ---------- ---------- ----------
                        ---------- ---------- ---------- ---------- ---------- ----------
                        acatgggtca gtcgatccta agtctcgggg aagttccgag tcgatcggca ggcgaaaggg
                        ---------- ---------- ---------- ---------- ---------- ----------
                        ---------- ---------- ---------- ---------- ---------- ----------

                        AATCGGGTCA ATATTCCCGA ACCCGAGCAC GGAGATCGCC GGCGGCAACG CAACTGAACT
                        AATCGGGTCA ATATTCCCGA ACCCGAGCAC GGAGATCGCC GGCGGTGACG CAAACGAACT
                        AATCGGGTCA ATATTCCCGA ACCCGAGCAC GGAGATCGCT GGCGGCGACG CAAACGAACT
                        aaccgggtcg acattcccgg gcccgagcgc ggagtcggct cgcggcaacg ccgacgagtc
                        aatcgggtca atattcccga acccgaaggc ggaagtcgct ggctgcaaag caaacgaact
                        AATCGGGTCA ATATTCCCGA ACCCGAAGGC GGAAGTCGCT GGCTGCAAAG CAAACGAACT
                        AATCGGGTCA ATATTCCCGA ACCCGAAGGC GGAAGTCGCT GGCTGCAAAG CAAACGAACT
                        aatcgggtca atattcccga acccggaggc ggagccctcc ggctgtaaag cgagcgagcc
                        aatcgggtca atattcccga acccggaggc ggagccctcc ggctgtaaag cgagcgagcc
                        ---------- ---------- ---------- ---------- ---------- ----------
                        aatctggtca atattcccga acccgaaggc ggagccctYc ggctgtaaag cgagcgagcc
                        ---------- ---------- ---------- ---------- ---------- ----------
                        aatcgggtca atattcccga acccgaaggc ggagtcctcc ggctgcaaag cgagcgagcc
                        ---------- ---------- ---------- ---------- ---------- ----------
                        ---------- ---------- ---------- ---------- ---------- ----------
                        ---------- ---------- ---------- ---------- ---------- ----------
                        aatcgggtca atattcccga acctgaaggt ggagcccgcc ggctgtaaag ctattgag--
                        aatcgggtca atattcccga acctgaaggc ggagcccgcc agctgcaaag ctatggagcc
                        aatcgggtca atattcccga acctgaaggc ggagcccgcc agctgcaaag ctatggagcc
                        aatcgggtca atattcccga acctgaaggt ggagcccgcc agctgcaaag ctatggagcc
                        aatcgggtca atattcccga acctgaaggc ggagcccgcc agctgcaaag ctatggagcc
                        aatcgggtca atattcccga acctgaaggc ggagcccgcc agctgcaaag ctatggagcc
                        ---------- ---------- ---------- ---------- ---------- ----------
                        ---------- ---------- ---------- ---------- ---------- ----------
                        aatcgggtca atattcccga acccgaag-c ggagcccgcc ggctgtgaag cgaacgagcc
                        aatcgggtca atattcccga acccgaaggc ggagcccgcc ggctgcgaag cgaacgagcc
                        ---------- ---------- ---------- ---------- ---------- ----------
                        ---------- ---------- ---------- ---------- ---------- ----------
                        aaccgggcta acattcccgg acgttcaggc agagccttcc ggcagcaatg catacgagcc
                        ---------- ---------- ---------- ---------- ---------- ----------
                        ---------- ---------- ---------- ---------- ---------- ----------

                        CGGATAAACG GCGGGAGTAA CTATGACTCT CTTAAGGTAG CCAAATGCCT CGTCATCTAA
                        CGGATAAACG GCGGGAGTAA CTATGACTCT CTTAAGGTAG CCAAATGCCT CGTCATCTAA
                        CGGATAAACG GCGGGAGTAA CTATGACTCT CTTAAGGTAG CCAAATGCCT CGTCATCTAA
                        cggataaacg gcgggagtaa ctatgactct cttaaggtag ccaaatgcct cgtcatctaa
                        cggataaacg gcgggagtaa ctatgactct cttaaggtag ccaaatgcct cgtcatctaa
                        CGGATAAACG GCGGGAGTAA CTATGACTCT CTTAAGGTAG CCAAATGCCT CGTCATCTAA
                        CGGATAAACG GCGGGAGTAA CTATGACTCT CTTAAGGTAG CCAAATGCCT CGTCATCTAA
                        cgcataaacg gcgggagtaa ctatgactct cttaaggtag ccaaatgcct cgtcatctaa
                        cgcataaacg gcgggagtaa ctatgactct cttaaggtag ccaaatgcct cgtcatctaa
                        ---------- ---------- ---------- ---------- ---------- ----------
                        cgcataaacg gcgggagtaa ctatgactct cttaaggtag ccaaatgcct cgtcatctaa
                        ----TAAACG GCGGGAGTAA CTATGACTCT CTTAAGGTAG CCAAATGCCT CGTCATCTAA
                        cgcataaacg gcgggagtaa ctatgactct cttaaggtag ccaaatgcct cgtcatctaa
                        ----taaacg gcgggagtaa ctatgactct cttaaggtag ccaaatgcct cgtcatctaa
                        ---------- ---------- ---------- ---------- ---------- ----------
                        ---------- ---------- ctatgactct cttaaggtag ccaaatgcct cgtcatctaa
                        ---------- ---------- ---------- ---------- ---------- ----------
                        cgga------ ---------- ---------- ---------- ---------- ----------
                        cggataaacg gcgggagtaa ctatgactct cttaaggtag ccaaatgcct cgtcatctaa
                        cggataaacg gcgggaagaa ---------- ---------- ---------- ----------
                        cggataaacg gcgggagtaa ctatgactct cttaaggtag ccaaatgcct cgtcatctaa
                        cggataaacg gcgggagtaa ctatgactct cttaaggtag ccaaatgcct cgtcatctaa
                        ---------- ---------- ---------- ---------- ---------- ----------
                        ---------- ---------- ---------- ---------- ---------- ----------
                        cggataaacg gcgggagtaa ctatgactct cttaaggtag ccaaatgcct cgtcatctaa
                        cggataaacg gcgggagtaa ctatgactct cttaaggtag ccaaatgcct cgtcatctaa
                        ---------- ---------- ---------- ---------- ---------- ----------
                        ---------- ---------- ---------- ---------- ---------- ----------
                        caggtaaacg gcgggagtaa ctatgactct cttaaggtag ccaaatgcct cgtcatctaa
                        ---------- ---------- ---------- ---------- ---------- ----------
                        ---------- ---------- ---------- ---------- ---------- ----------

                        TTAGTGACGC GCATGAATGG ATTAACGAGA TTCCCACTGT CCCTATCTAC TATCTAGCGA
                        TTAGTGACGC GCATGAATGG ATTAACGAGA TTCCCACTGT CCCTATCTAC TATCTAGCGA
                        TTAGTGACGC GCATGAATGG ATTAACGAGA TTCCCACTGT CCCTATCTAC TATCTAGCGA
                        ttagtgacgc gcatgaatgg attaacgaga ttcccactgt ccctatctac tatctagcga
                        ttagtgacgc gcatgaatgg attaacgaga ttcccactgt ccctatctac tatctagcga
                        TTAGTGACGC GCATGAATGG ATTAACGAGA TTCCCACTGT CCCTATCTAC TATCTAGCGA
                        TTAGTGACGC GCATGAATGG ATTAACGAGA TTCCCACTGT CCCTATCTAC TATCTAGCGA
                        ttagtgacgc gcatgaatgg attaacgaga ttcccactgt ccctatctac tatctagcga
                        ttagtgacgc gcatgaatgg attaacgaga ttcccactgt ccctatctac tatctagcga
                        ---------- ---------- ---------- ---------- ---------- ----------
                        ttagtgacgc gcatgaatgg attaacgaga ttccctctgt ccctgtctgc tatccggcga
                        TTAGTGACGC GCATGAATGG ATTAACGAGA TTCCCACTGT CCCTATCTAC TATCTAGCGA
                        ttagtgacgc gcatgaatgg attaacgaga ttcccactgt ccctatctac tatctagcga
                        ttagtgacgc gcatgaatgg attaacgaga ttcccactgt ccctatctac tatctagcga
                        ---------- ---------- -------aga ttcccactgt cc-tatctac tatctagcga
                        ttagtgacgc gcatgaatgg attaacgaga ttcccactgt ccctatctac tatctagcga
                        ---------- ---------- ---------- ---------- ---------- ----------
                        ---------- ---------- ---------- ---------- ---------- ----------
                        ttagtgacgc gcatgaatgg attaacgaga ttcccactgt ccctatctac tatctagcga
                        ---------- ---------- ---------- ---------- ---------- ----------
                        ttagtgacgc gcatgaatgg attaacgaga ttcccactgt ccctatctac t---------
                        ttagtgacgc gcatgaatgg attaacgaga ttcccactgt ccctatctac t---------
                        ---------- ---------- ---------- ---------- ---------- ----------
                        ---------- ---------- ---------- ---------- ---------- ----------
                        ttagtgacgc gcatgaatgg attaacgaga ttcccactgt ccctatctac tatctagcga
                        ttagtgacgc gcatgaatgg attaacgaga ttcccactgt ccctatctac tatctagcga
                        ---------- ---------- ---------- ---------- ---------- ----------
                        ---------- ---------- ---------- ---------- ---------- ----------
                        ttagtgacgc gcatgaatgg attaacgaga ttcccactgt ccctatctac tatctggcga
                        ---------- ---------- ---------- ---------- ---------- ----------
                        ---------- ---------- ---------- ---------- ---------- ----------

                        AACCACAGCC AAGGGAACGG GCTTGGCAGA ATTAGCGGGG AAAGAAGACC CTGTTGAGCT
                        AACCACAGCC AAGGGAACGG GCTTGGCAGA ATTAGCGGGG AAAGAAGACC CTGTTGAGCT
                        AACCACAGCC AAGGGAACGG GCTTGGCAGA ATTAGCGGGG AAAGAAGACC CTGTTGAGCT
                        aaccacagcc aagggaacgg gcttggcaga atcggcgggg aaagaagacc ctgttgagct
                        aaccacagcc aagggaacgg gcttggcaga attagcgggg aaagaagacc ctgttgagct
                        AACCACAGCC AAGGGAACGG GCTTGGCAGA ATTAGCGGGG AAAGAAGACC CTGTTGAGCT
                        AACCACAGCC AAGGGAACGG GCTTGGCAGA ATTAGCGGGG AAAGAAGACC CTGTTGAGCT
                        aaccacagcc aagggaacgg gcttggcaga atcagcgggg aaagaagacc ctgttgagct
                        aaccacagcc aagggaacgg gcttggcaga atcagcgggg aaagaagacc ctgttgagct
                        ---------- -----aaggg gcttggcaga atcagcgggg aaagaaaacc ctgttgagct
                        aaccacagcc aagggaacgg gcttggcgga attagcgggg aaagaagacc ctgttgagct
                        AACCACAGCC AAGGGAACGG GCTTGGCAGA ATTAGCGGGG AAAGAAGACC CTGTTGAGCT
                        aaccacagcc aagggaacgg gcttggcaga atcagcgggg aaagaagacc ctgttgagct
                        aaccacagcc aagggaacgg gcttggcaga atcagcgggg aaagaagacc ctgttgagct
                        aaccacagcc aagggaacgg gcttggcaga atcagcgggg aaagaagacc ctgttgagct
                        aaccacagcc aagggaacgg gcttggcaga atcagcgggg aaagaagacc ctgttgagct
                        ---------- ---------- ---------- ---------- ---------- ----------
                        ---------- ---------- ---------- ---------- ---------- ----------
                        aaccacagcc aagggaacgg gcttggcaga atcagcgggg aaagaagacc ctgttgagct
                        ---------- ---------- ---------- ---------- ---------- ----------
                        ---------- ---------- ---------- ---------- ---------- ----------
                        ---------- ---------- ---------- ---------- ---------- ----------
                        ---------- ---------- ---------- ---------- ---------- ----------
                        ---------- ---------- ---------- ---------- ---------- ----------
                        aaccacagcc aagggaacgg gcttggcaga atcagcgggg aaagaagacc ctgttgagct
                        aaccacagcc aagggaacgg gcttggcaga atcagcgggg aaagaagacc ctgttgagct
                        ---------- ---------- ---------- ---------- ---------- ----------
                        ---------- ---------- ---------- ---------- ---------- ----------
                        aaccacagcc aagggaacgg gcttggcaca attagcgggg aaagaagacc ctgttgagct
                        ---------- -----aacgg gcttggcaaa atcggcgggg aaagaagacc ctgttgagct
                        ---------- -----aacgg gcttggcaga atcggcgggg aaagaagacc ctgttgagct

                        TGACTCTAGT CCGACTCTGT GAAGGGACAT TGGGGGCGTA GGATAGGTGG GAGGGTCGAC
                        TGACTCTAGT CCGACTCTGT GAAGGGACAT TGGAGGCGTA GGATAGGTGG GAGGGTCGCC
                        TGACTCTAGT CCGACTCTGT GAAGGGACAT GGGAGGTGTA GGATAGGTGG GAGGTCCGCC
                        tgactctagt ccgactctgt gaagagacat gaggggtgta ggataagtgg gagggccRac
                        tgactctagt ctgaccttgt gaagagacat gaggggtgta gaataggtgg gagggccgcc
                        TGACTCTAGT CTGACCTTGT GAAGAGACAT GAGGGGTGTA GAATAGGTGG GAGGGCCGCC
                        TGACTCTAGT CTGACCTTGT GAAGAGACAT GAGGGGTGTA GAATAGGTGG GAGGGCCGCC
                        tgactctagt ctgaccttgt gaagagacac ggggggtgta ggataggtgg gaggttcgcc
                        tgactctagt ctgaccttgt gaagagacac ggggggtgta ggataggtgg gaggttcgcc
                        tgactctagt ctgaccttgt gaagagacac ggggggtgta ggataggtgg gaggttcgcc
                        tgactctagt ccgactttgt gaagagacat gagaggcgta ggataagtgg gagggccgac
                        TGACTCTAGT CTGACCTTGT GAAGAGACAT GAGGGGTGTA GAATAGGTGG GAGG------
                        tgactctagt ctgaccttgt gaagagacac ggggggtgta ggataggtgg gaggttcgcc
                        tgactctagt ctgactttgt gaagagacac gaggggtgta gaataggtgg gaggttcgcc
                        tgactctagt ctgaccttgt gaagagacac ggggggtgta ggataggtgg gagggccgac
                        tgactctagt ctgaccttgt gaagagacac ggggggtgta gaataggtgg gaggttcgcc
                        ---------- ---------- ---------- ---------- ---------- ----------
                        ---------- ---------- ---------- ---------- ---------- ----------
                        tgactctagt ctggtcttgt gaagagacat gaggggtgta gaataggtgg gagggccgac
                        ---------- ---------- ---------- ---------- ---------- ----------
                        ---------- ---------- ---------- ---------- ---------- ----------
                        ---------- ---------- ---------- ---------- ---------- ----------
                        ---------- ---------- ---------- ---------- ---------- ----------
                        ---------- ---------- ---------- ---------- ---------- ----------
                        tgactctagt ctgaccttgt gaagagacat gaggggtgta ggataggtgg gaggatcgcc
                        tgactctagt ctgaccttgt gaagagacat gaggggtgta ggataggtgg gaggaccgac
                        ---------- ---------- ---------- ---------- ---------- ----------
                        ---------- ---------- ---------- ---------- ---------- ----------
                        tgactctagt ctggtgccgt gaagagactt gagaggtgta gaataagtgg gaggtccgcc
                        tgactctagt ctgatgtcgt gaagagacat gggaggtgta gaataagtgg gaggtccgcc
                        tgactctagt tcgacgccgt gaagagacat gagaggtgta gaataagtgg gaggttcgcc

                        GGTGAAATAC CACTACTCCG ATCGTTCTTT CACTTATCCG GTGAAGCGGG GAGCGGGGCT
                        GGTGAAATAC CACTACTCCG ATCGTTCCTT CACTTATCCG GTGAAGCGGG GAGCGGGGCT
                        GGTGAAATAC CACTACTCTG ATCGTTTTTT CACTTACCCG GTGAGGCGGG GAGCGGGGCT
                        ggcgaaatac cactactctc atcgWttctt tacttatccg gKggKgcSgg aggcgggcct
                        ggtgaaatac cactactttc atcgtttctt tacttatcgg gtgatgcggg aagcgggcct
                        GGTGAAATAC CACTACTTTC ATCGTTTCTT TACTTATCGG GTGATGCGGG AAGCGGGCCT
                        GGTGAAATAC CACTACTTTC ATCGTTTCTT TACTTATCGG GTGATGCGGG AAGCGGGCCT
                        ggtgaaatac cactactctc gtcgtttctt tacttattcg gtgaggcggg aagcgggcct
                        ggtgaaatac cactactctc gtcgtttctt tacttattcg gtgaggcggg aagcgggcct
                        ggtgaaatac cactactctc gtcgtttctt tacttattcg gtgaggcggg aagcgggcct
                        agtgaaatac cactactccc atcgtttttt tgcttattca gtaaagcgga gagcgaccct
                        GGTGAAATAC CACTACTTTC ATCGTTTCTT TACTTATCGG GTGATGCGGG AAGCGGGCCT
                        ggtgaaatac cactactctc gtcgtttctt tacttattcg gtgaggcggg aagcgggcct
                        ggtgaaatac cactactctc gtcgtttctt tacttattcg gtgaggcggg aagcgggcct
                        ggtgaaatac cactactctc gtcgtctctt tacttattcg gtgaggcggg aagcgggcct
                        ggtgaaatac cactactctc gtcgtttctt tacttattcg gtgaggcggg aagcgggcct
                        ---------- ---------- ---------- ---------- ---------- ----------
                        ---------- ---------- ---------- ---------- ---------- ----------
                        ggtgaaatac cactactctc atcgtttctt tacttagtcg gtgagacggg aaacgggcct
                        ---------- ---------- ---------- ---------- ---------- ----------
                        ---------- ---------- ---------- ---------- ---------- ----------
                        ---------- ---------- ---------- ---------- ---------- ----------
                        ---------- ---------- ---------- ---------- ---------- ----------
                        ---------- ---------- ---------- ---------- ---------- ----------
                        agtgaaatac cactactctc atcgtttctt tacttattcg gtgagtcggg aaacgggcct
                        ggtgaaatac cactactctc atcgtttctt tacttattcg gtgagtcggg aaacgggcct
                        ---------- ---------- ---------- ---------- ---------- ----------
                        ---------- ---------- ---------- ---------- ---------- ----------
                        gttgaaatac cactactctc aacgtttttt tacttatccg gtgaggcggg tggYacg-ct
                        ggtgaaatac cactactccc atcgtttctt tacttatccg gtgaagcggg gaacgggcct
                        ggtgaaatac cactactccc atcgtttctt tacttatccg gtgaagcggg aaacgagcct

                        AGCGTTCAAG CGCGACCCGC TCCGGCGACA GCGTCAGGCG GGGAGTTTGA CTGGGGCGGT
                        GGCGTTCAAG CGCGACCCGC TCCGGCGACA GCGTCAGGCG GGGAGTTTGA CTGGGGCGGT
                        GGCGT-CAAG CGCGACCCGC TCCGGCGACA GTGTCAGGCG GGGAGTTTGA CTGGGGCGGT
                        ggcgtcgaaa cgcgacccgY tccggagaca gcgtcaggcg gggagtttga ctggggcggt
                        agcgtt-aag cgcgacccgc tccggagaca gcgtcaggcg gggagtttga ctggggcggt
                        AGCGTT-AAG CGCGACCCGC TCCGGAGACA GCGTCAGG-- ---------- ----------
                        AGCGCT-AAG CGCGACCCGC TCCGGAGACA GCGTCAGG-- ---------- ----------
                        ggcgct-aag cgcgacccgc tccgacgaca gcgtcag-cg gggagtttga ctggggcggt
                        ggcgct-aag cgcgacccgc tccgacgaca gcgtcaggcg gggagtttga ctggggcggt
                        ggcgct-aag cgcgacccgc tccgacgaca gcgtcaggcg gggagtttga ctggggcggt
                        ggtctt-aag cgcgatccgc tctgaagacg gtgtcaggcg gggagtttga ctggggcggt
                        AGCGTT-AAG CGCGACCCGC TCCGGAGACA GCGTCAGGCG GGGAGTTTGA CTGGGGCGGT
                        ggcgct-aag cgcgacccgc tccgacgaca gcgtcaggcg gggagtttga ctggggcggt
                        ggcgcc-aag cgcgacccgc tccgaggaca gcgtcaggcg gggagtttga ctggggcggt
                        ggcgct-aag cgcgacccgc tccgacgaca gcgtcaggcg gggagtttga ctggggcggt
                        ggcgct-aag cgcgacccgc tccgacgaca gcgtcaggcg gggagtttga ctggggcggt
                        ---------- ---------- ---------- ---------- ---------- ----------
                        ---------- ---------- ---------- ---------- ---------- ----------
                        ggcgct-aag cgcgacccgc tccgacgaca gcgtcaggcg gggagtttga ctggggcggt
                        ---------- ---------- ---------- ---------- ---------- ----------
                        ---------- ---------- ---------- ---------- ---------- ----------
                        ---------- ---------- ---------- ---------- ---------- ----------
                        ---------- ---------- ---------- ---------- ---------- ----------
                        ---------- ---------- ---------- ---------- ---------- ----------
                        ggtgct-aag gccgacccgc tccgaagaca gcgtcaggcg gggagtttga ctggggcggt
                        ggtgct-aag cgcgacccgc tccgaagaca gcgtcaggcg gggagtttga ctggggcggt
                        ---------- ---------- ---------- ---------- ---------- ----------
                        ---------- ---------- ---------- ---------- ---------- ----------
                        ggtgcc-aac cgcgacccgt ttcggagaaa ccgccaggcg gggagtttga ctggggcggt
                        ggtgcc-aaa cgtgacccgt tccggagacg ccgtcaggcg gggagtttga ctggggcggt
                        ggtgcc-aag cgcaacccgc tccggagacg ccgtcaggcg gggagtttga ctggggcggt

                        ACATCTGTCA AAGGGTAACG CAGGTGTCCC AAGGCGAGCT CAGCGGGGAC GGAAACCCCT
                        ACATCTGTCA AAGGGTAACG CAGGTGTCCC AAGGCGAGCT CAGAGGGGAC GGAAACCCCT
                        ACAACTGTCA AACGGTAACG CAGGTGTCCT AAGGCGAGCT CAGAGGGGAC GGAAACCCCA
                        acatctgtca aacggtaacg caggtgtccc aaggcgggct cggcgaggac ggaaacctcg
                        acatctgtca aatggtaacg caggtgtcct aaggcgagct cagcgaggac ggaaacctcg
                        ---------- ---------- ---------- ---------- ---------- ----------
                        ---------- ---------- ---------- ---------- ---------- ----------
                        acatctgtca aatggtaacg caggtgtcct aaggcgagct cagcgaggac ggaaacctcg
                        acatctgtca aatggtaacg caggtgtcct aaggcgagct cagcgaggac ggaaacctcg
                        acatctgtca aatggtaacg caggtgtcct aaggcgagct cagcgaggac ggaaacctcg
                        acatctgtca aagagtaacg caggtgtcct aaggtgagct cagcgaggac ggaaacctcg
                        ACATCTGTCA AATGGTAACG CAGGTGTCCT AAGGCGAGCT CAGCGAGGAC GGAAACCTCG
                        acatctgtca aatggtaacg caggtgtcct aaggcgagct cagcgaggac ggaaacctcg
                        acatctgtca aatggtaacg caggtgtcct aaggcgagct cagcgaggac ggaaacctcg
                        acatctgtca aatggtaacg caggtgtcct aaggcgagct cagcgaggac ggaaacctcg
                        acatctgtca aatggtaacg caggtgtcct aaggcgagct cagcgaggac ggaaacctcg
                        ---------- ---------- ---------- ---------- ---------- ----------
                        ---------- ---------- ---------- ---------- ---------- ----------
                        acatctgtca aatggtaacg caggtgtcct aaggccagct cagcgaggac ggaaacctcg
                        ---------- ---------- ---------- ---------- ---------- ----------
                        ---------- ---------- ---------- ---------- ---------- ----------
                        ---------- ---------- ---------- ---------- ---------- ----------
                        ---------- ---------- ---------- ---------- ---------- ----------
                        ---------- ---------- ---------- ---------- ---------- ----------
                        acatctgtca aatggtaacg caggtgtcct aaggcgagct cagcgaggac ggaaacctcg
                        acatctgtca aatggtaacg caggtgtcct aaggcgagct cagcgaggac ggaaacctcg
                        ---------- ---------- ---------- ---------- ---------- ----------
                        ---------- ---------- ---------- ---------- ---------- ----------
                        acatctgtca aatggtaacg caggtgtccc aaggagagct cagcgaggac agaaacctcg
                        acatctgtca aatggtaacg caggtgtcct aaggcgagct cagcgaggcc agaaacctcg
                        acatctgtca aatggtaacg caggtgtcct aaggcgagct cagcgaggac agaaacctcg

                        CGTGGAGCAA AAGGGCAAAA GCTCGCTTGA TTTTGATTTT CAGTACGAAT ACGAACCGCG
                        CGTGGAGCAA AAGGGCAAAA GCTCGCTTGA TTTTGATTTT CAGTACGAAT ACGAACCGCG
                        CGTAGAGCAA AAGGGCAAAA GCTCGCTTGA TTTTGATTTT CAGTGCGAAT ACAGACCGTG
                        cgtggagcaa aagggcaaat gcccgcttga tcccgatttt cagtgtgaat acggaccgtg
                        cgtagagcaa aagggcaaaa gctcgcttga ttttgatttt cagtatgaat acagaccgtg
                        ---------- ---------- ---------- ---------- ---------- ----------
                        ---------- ---------- ---------- ---------- ---------- ----------
                        cgtagagcaa aagggcaaaa gctcgtttga ttttgatttt cagtatgaat acagaccgtg
                        cgtagagcaa aagggcaaaa gctcgtttga ttttgatttt cagtatgaat acagaccgtg
                        cgtagagcaa aagggcaaaa gctcgtttga ttttgatttt cagtatgaat acagaccgtg
                        cgtagagcaa aagggcaaaa gctcacttga tttggatttt cagtatgaat acagaccgcg
                        CGTAGAGCAA AAGGGCAAAA GCTCGCTTGA TTTTGATTTT CAGTATGAAT ACAGACCGTG
                        cgtagagcaa aagggcaaaa gctcgtttga ttttgatttt cagtatgaat acagaccgtg
                        cgtagagcaa aagggcaaaa gctcgtttga tttttatttt cagtatgaat acagaccgtg
                        cgtggagcaa aagggcaaaa gctcgtttga ttttgatttt cagtatgaat acagaccgtg
                        cgtagagcaa aagggcaaaa gctcgtttga ttttgatttt cagtatgaat acagaccgtg
                        ---------- ---------- ---------- ---------- ---------- ----------
                        ---------- ---------- ---------- ---------- ---------- ----------
                        cgtagagcag aagggcaaat gctggcttga ttttgatttt cagtatgaat acagaccgtg
                        ---------- ---------- ---------- ---------- ---------- ----------
                        ---------- ---------- ---------- ---------- ---------- ----------
                        ---------- ---------- ---------- ---------- ---------- ----------
                        ---------- ---------- ---------- ---------- ---------- ----------
                        ---------- ---------- ---------- ---------- ---------- ----------
                        cgtagagcaa aagggcaaaa gctcgcttga tcttgatttt cagtacgaat acagaccgtg
                        cgtagagcaa aagggcaaaa gctcgcttga tcttgatttt cagtacgaat acagaccgtg
                        ---------- ---------- ---------- ---------- ---------- ----------
                        ---------- ---------- ---------- ---------- ---------- ----------
                        cgtagagcaa aagggcaaaa gctctcttga tctcgatttt cagtacgaat acagaccgcg
                        cgtagagcaa aagggcaaaa gctctcttga tctcgatttt cagtacgaat acagaccgcg
                        cgtagagcaa aagggcaaaa gctctcttga tctcgatttt cagtacgaat acagaccgcg

                        AAAGCGCGGC CTATCGATCC TTTCGACGTC GAGAGTTTCG AGCGAGAGGT GTCAGAAAAG
                        AAAGCGTGGC CTATCGATCC TTTCGACATC GGGAGCTTCG AGCGAGAGGT GTCAGAAAAG
                        AAAGCGCGGC CTATCGATCC TTTTGAGGTT GAGGGTTTCA AGCAAGAGGT GTCAGAAAAG
                        aaagcgcggc ctatcgatcc ttttgtcgcg gcgggtctcc ggcaagaggt gtcagaaaag
                        aaagcgtggc ctatcgatcc ttttgatttt aggagtttta agcaagaggt gtcagaaaag
                        ---------- ---------- ---------- ---------- ---------- ----------
                        ---------- ---------- ---------- ---------- ---------- ----------
                        aaagcgtggc ctatcgatcc ttttgacctt cggggtttga agcaagaggt gtcagaaaag
                        aaagcgtggc ctatcgatcc ttttgacctt cggggtttga agcaagaggg ttcagaaaag
                        aaagcgtggc ctatcgatcc ttttgacctt cggggtttga agcaagaggt gtcagaaaag
                        aaagcgtggc ctatcgatcc ctttgagttt gcgagtttca agcaaggggt gtcagaaaag
                        AAAGCGTGGC CTATCGATCC TTTTGATTTT AGGAGTTTTA AGCAAGAGGT GTCAGAAAAG
                        aaagcgtggc ctatcgatcc ttttgacctt cggggtttga agcaagaggt gtcagaaaag
                        aaagcgcggc ctatcgatcc ttttgccctt cggagtttga agcaagaggt gtcagaaaag
                        aaagcgtggc ctatcgatcc ttttgagctt cggagtttga agcaagaggt gtcagaaaag
                        aaagcgtggc ctatcgatcc ttttgacctt cggggtttga agcaagaggt gtcagaaaag
                        ---------- ---------- ---------- ---------- ---------- ----------
                        ---------- ---------- ---------- ---------- ---------- ----------
                        aaagcgtggc ctaacgatcc ttttgacttt cggagtttga agcaagaggt gtcagaaaag
                        ---------- ---------- ---------- ---------- ---------- ----------
                        ---------- ---------- ---------- ---------- ---------- ----------
                        ---------- ---------- ---------- ---------- ---------- ----------
                        ---------- ---------- ---------- ---------- ---------- ----------
                        ---------- ---------- ---------- ---------- ---------- ----------
                        aaagcgtggc ctatcgatcc ttttgaccgt cggagttcga cgcaaggggt gtcagaaaag
                        aaagcgtggc ctatcgatcc ttttgaccgt cggagttcga cgcaaggggt gtcagaaaag
                        ---------- ---------- ---------- ---------- ---------- ----------
                        ---------- ---------- ---------- ---------- ---------- ----------
                        aaagcggggc ctatcgatcc ttttgaccgt cggaattcga cgcaaggggt gtcagaaaag
                        aaagcggggc ctatcgatcc ttttggctgt ccgagttcga cgcaaggggt gtcagaaaag
                        aaagcgcggc ctatcgatcc ttttgactgt cagggttcga cgcaaggggt gtcagaaaag

                        TTACCACAGG GATAACTGGC TTGTGGCGGC CAAGCGTTCA TAGCGACGTC GCTTTTTGAT
                        TTACCACAGG GATAACTGGC TTGTGGCGGC CAAGCGTTCA TAGCGACGTC GCTTTTTGAT
                        TTACCACAGG GATAACTGGC TTGTGGCGGC CAAGCGTTCA TAGCGACGTC GCTTTTTGAT
                        ttaccacagg gataactggc ttgtggcggc caagcgttca tagcgacgtc gctttttgat
                        ttaccacagg gataactggc ttgtggcggc caagcgttca tagcgacgtc gctttttgat
                        ---------- ---------- ---------- ---------- ---------- ----------
                        ---------- ---------- ---------- ---------- ---------- ----------
                        ttaccacagg gataactggc ttgtggcagc caagcgttca tagcgacgtt gctttttgat
                        ttaccacagg gataactggc ttgtggcagc caagcgttca tagcgacgtt gctttttgat
                        ttaccacagg gataactggc ttgtggcagc caagcgtcca tagcgtac-- ----------
                        ttaccacagg gataactggc ttgtggcagc caagcgttca tagcgacgtt gctttttgat
                        TTACCACAGG GATAACTGGC TTGTGGCGGC CAAGCGTTCA TAGCGACGTC GCTTTTTGAT
                        ttaccacagg gataactggc ttgtggcagc caagcgttca tagcgacgtt gctttttgat
                        ttaccacagg gataactggc ttgtggcagc caagcgttca tagcgacgtt gctttttgat
                        ttaccacagg gataactggc ttgtggcagc caagcgttca tagcgacgtt gctttt-ga-
                        ttaccacagg gataactggc ttgtggcagc caagcgttca tagcgacgtt gctttttgat
                        ---------- ---------- ---------- ---------- ---------- ----------
                        ---------- ---------- ---------- ---------- ---------- ----------
                        ttaccacagg gataactggc ttgtggcagc caagcgttca tagcgacgtt gctttttgat
                        ---------- ---------- ---------- ---------- ---------- ----------
                        ---------- ---------- ---------- ---------- ---------- ----------
                        ---------- ---------- ---------- ---------- ---------- ----------
                        ---------- ---------- ---------- ---------- ---------- ----------
                        ---------- ---------- ---------- ---------- ---------- ----------
                        ttaccacagg gataactggc ttgtggcagc caagcgttca tagcgacgtt gctttttgat
                        ttaccacagg gataactggc ttgtggcagc caagcgttca tagcgacgtt gctttttgat
                        ---------- ---------- ---------- ---------- ---------- ----------
                        ---------- ---------- ---------- ---------- ---------- ----------
                        ttaccacagg gataactggc ttgtggcggc caagcgttca tagcgacgtc gctttttgat
                        ttaccacagg gataactggc ttgtggcggc caagcgtt-- ---------- ----------
                        ttaccacagg gataactggc ttgtggcggc caagcgtt-- ---------- ----------

                        CCTTCGATGT CGGCTCT
                        CCTTCGATGT CGGCTCT
                        CCTTCGATGT CGGCTCT
                        ccttcgatgt cggctct
                        ccttcgatgt cggctct
                        ---------- -------
                        ---------- -------
                        ccttcgatgt cggctct
                        ccttcgatgt cggctct
                        ---------- -------
                        ccttcgatgt cggctct
                        CCTTCGATGT CGGCTCT
                        ccttcgatgt cggctct
                        ccttcgatgt cggctct
                        ---------- -------
                        ccttcgatgt cggctct
                        ---------- -------
                        ---------- -------
                        ccttcgatgt cggctct
                        ---------- -------
                        ---------- -------
                        ---------- -------
                        ---------- -------
                        ---------- -------
                        ccttcgatgt cggctct
                        ccttcgatgt cggctct
                        ---------- -------
                        ---------- -------
                        tcttcgatgt cggctct
                        ---------- -------
                        ---------- -------
